# Supplementary material for: Iridium(i) complexes bearing hemilabile coumarin-functionalised N-heterocyclic carbene ligands with application as alkyne hydrosilylation catalysts
Source: Royal Society of Chemistry journal article supplement (doi:10.1039/d1dt01946e), 2021-01-01
Supplement: d1dt01946e1.pdf [file d1dt01946e1.pdf]

## Supporting Information

### **Iridium(I) Complexes Bearing Hemilabile Coumarin-Functionalised N-Heterocyclic Carbene Ligands with Application as Alkyne Hydrosilylation Catalysts**

Mert Olgun Karataş,<sup>a,b,c</sup> Bülent Alici,<sup>b,c</sup> Vincenzo Passarelli,<sup>a</sup> Ismail Özdemir,<sup>b,c</sup> Jesús J. Pérez-Torrente,<sup>\*a</sup> and Ricardo Castarlenas,<sup>\*a</sup>

<sup>a</sup>Departamento de Química Inorgánica – Instituto de Síntesis Química y Catálisis Homogénea (ISQCH), Universidad de Zaragoza – CSIC, C/ Pedro Cerbuna 12, 50009 Zaragoza, Spain

<sup>b</sup>Department of Chemistry, Faculty of Sciences, Inonu University, 44280, Malatya, Turkey

<sup>c</sup>Catalysis Research and Application Center, İnönü University, 44280 Malatya (Turkey)

E-mail: rcastar@unizar.es, perez@unizar.es

### **Table of contents**

|                                                                                     |     |
|-------------------------------------------------------------------------------------|-----|
| <b>1. Synthesis of (4-chloromethylene)coumarin derivatives (1a-c)</b>               | S2  |
| <b>2. Synthesis of imidazolium and benzimidazolium chlorides (2a-e and 3a-c)</b>    | S2  |
| <b>3. Calculation of thermodynamic parameters</b>                                   | S4  |
| <b>4. Variable-temperature NMR spectra</b>                                          | S6  |
| <b>5. NMR spectra of coumarin-functionalized azolium salts and Ir-NHC complexes</b> | S8  |
| <b>6. References</b>                                                                | S29 |

## 1. Synthesis of (4-chloromethylene)coumarin derivatives (1a-c)

**1a-c** were prepared according to the procedure described by Frasinuk *et al.*<sup>1</sup> Compound **1a** was available from our previous study.<sup>2</sup>

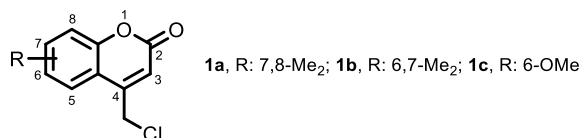

**Chart S1.** (4-chloromethylene)coumarin derivatives used in this study.

**Chloromethylene-6,7-dimethyl-2H-chromene-2-one (1b).** White solid, (69%), mp: 216-218 °C (lit. 215-217 °C).<sup>1</sup> IR (cm<sup>-1</sup>): 1717 (C=O), 1638 (C=C). <sup>1</sup>H NMR (300 MHz, DMSO-d<sub>6</sub>, 298 K): δ 7.62 (s, 1H, H<sub>Ar</sub>), 7.27 (s, 1H, H<sub>Ar</sub>), 6.59 (s, 1H, C=CH), 5.00 (s, 2H, CH<sub>2</sub>Cl), 2.33 and 2.31 both (s, 6H, H<sub>Ar</sub>CH<sub>3</sub>). <sup>13</sup>C NMR (75 MHz, DMSO-d<sub>6</sub>, 298 K): δ 159.9 (C=O), 151.7, 150.7, 142.3, 132.9, 125.0, 117.1, 114.6, 114.2, 41.2, 19.6, 18.9.

**4-Chloromethylene-6-methoxy-2H-chromene-2-one (1c).** Green solid, (49%), mp: 122-123 °C. IR (cm<sup>-1</sup>): 1718 (C=O), 1622 (C=C). <sup>1</sup>H NMR (300 MHz, DMSO-d<sub>6</sub>, 298 K): δ 7.41 (m, 1H, H<sub>Ar</sub>), 7.32 (m, 1H, H<sub>Ar</sub>), 7.27 (m, 1H, H<sub>Ar</sub>), 6.69 (s, 1H, C=CH), 5.07 (s, 2H, CH<sub>2</sub>Cl), 3.85 (s, 3H, H<sub>Ar</sub>OCH<sub>3</sub>). <sup>13</sup>C NMR (75 MHz, DMSO-d<sub>6</sub>, 298 K): δ 160.2 (C=O), 156.0, 150.9, 148.1, 119.9, 118.3, 118.0, 116.2, 108.7, 56.3, 41.8.

## 2. Synthesis of imidazolium and benzimidazolium chlorides (2a-e and 3a-c)

Coumarin-functionalized imidazolium and benzimidazolium salts, **2a-b** and **3b-c**, respectively, were prepared according to the procedure described by us for the synthesis of **2c-e** and **3a**.<sup>2</sup>

*General method.* A DMF solution (5 mL) of **1** (5 mmol) and the corresponding *N*-alkylimidazole or *N*-alkylbenzimidazole (5 mmol) was heated for 3 days at 363 K. The mixture was allowed to cool to room temperature and then acetone (20 mL) was added to give a white precipitate which was collected by filtration. The crude product was washed with acetone (2 x 10 mL) and diethyl ether (2x10 mL), and dried under reduced pressure to afford the salts as white solids. Chemical shifts (expressed in parts per million) are referenced to residual solvent peaks (<sup>1</sup>H, <sup>13</sup>C{<sup>1</sup>H}). Coupling constants, *J*, are given in Hz. Spectral assignments were achieved by combination of <sup>1</sup>H-<sup>1</sup>H COSY, <sup>13</sup>C{<sup>1</sup>H}-APT and <sup>1</sup>H-<sup>13</sup>C HSQC/HMBC experiments.

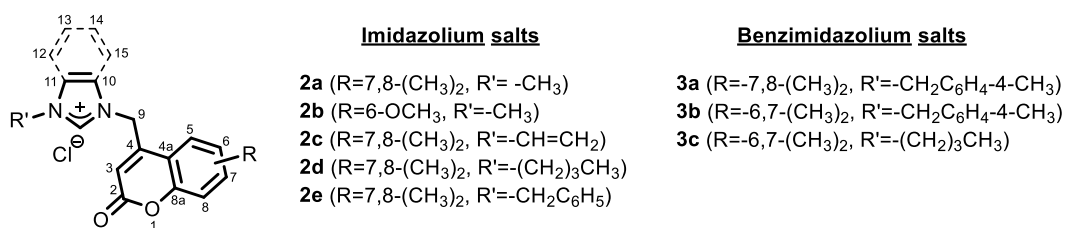

**Chart S2.** Coumarin-functionalized carbene precursors used in this study.

**1-Methyl-3-((7,8-dimethyl-2H-chromene-2-one-4-yl)methyl)imidazolium chloride (2a).** White solid, 1.1 g (72%). IR (cm<sup>-1</sup>): 1710 (C=O), 1629 (C=C), 1606 (C=N). <sup>1</sup>H NMR (300 MHz, DMSO-d<sub>6</sub>, 298 K): δ 9.48 (s, 1H, NCHN), 7.94 and 7.86 (both m, 2H, H<sub>10</sub> and H<sub>11</sub>), 7.63 (d, *J*<sub>H-H</sub>= 8.1 Hz, 1H, H<sub>5</sub>), 7.26 (d, *J*<sub>H-H</sub>= 8.1 Hz, H<sub>6</sub>), 6.07 (s, 1H, H<sub>3</sub>), 5.89 (s, 2H, H<sub>9</sub>), 3.91 (s, 3H, NCH<sub>3</sub>), 2.38 (s, 3H, H<sub>ArCH3-at-7-pos.</sub>), 2.29 (s, 3H, H<sub>ArCH3-at-8-pos.</sub>). <sup>13</sup>C{<sup>1</sup>H}-APT NMR (75 MHz, DMSO-d<sub>6</sub>, 298 K): δ 160.0 (C=O), 151.6 (C<sub>8a</sub>), 150.0 (C<sub>4</sub>), 142.7 (C<sub>7</sub>), 138.3 (NCHN), 126.3 (C<sub>6</sub>), 124.7 and 123.5 (C<sub>10</sub> and C<sub>11</sub>), 124.5 (C<sub>8</sub>), 121.8 (C<sub>5</sub>), 115.0 (C<sub>4a</sub>), 113.6 (C<sub>3</sub>), 48.8 (C<sub>9</sub>), 36.6 (-NCH<sub>3</sub>), 20.4 (ArCH<sub>3-at-7-pos.</sub>), 11.7 (ArCH<sub>3-at-8-pos.</sub>).

**1-Methyl-3-((6-methoxy-2H-chromene-2-one-4-yl)methyl)imidazolium chloride (2b).** White solid, 0.90 g (59%). IR (cm<sup>-1</sup>): 1708 (C=O), 1626 (C=C), 1573 (C=N). <sup>1</sup>H NMR (300 MHz, DMSO-d<sub>6</sub>, 298 K): δ 9.53 (s, 1H, NCHN), 7.98 and 7.88 (both m, 2H, H<sub>10</sub> and H<sub>11</sub>), 7.43, 7.37 and 7.29 (all m, 3H, H<sub>5</sub>, H<sub>7</sub> and H<sub>8</sub>), 6.16 (s, 1H, H<sub>3</sub>), 5.98 (s, 2H, H<sub>9</sub>), 3.93 (s, 3H, NCH<sub>3</sub>), 3.87 (s, 3H, ArOCH<sub>3</sub>). <sup>13</sup>C{<sup>1</sup>H}-APT NMR (75 MHz, DMSO-d<sub>6</sub>, 298 K): δ 160.0 (C=O), 156.3 (C<sub>6</sub>), 149.5 (C<sub>4</sub>), 147.8 (C<sub>8a</sub>), 138.3 (NCHN), 124.7 and 123.4 (C<sub>10</sub> and C<sub>11</sub>), 120.3, 118.4 and 108.1 (C<sub>5</sub>, C<sub>7</sub> and C<sub>8</sub>), 117.8 (C<sub>4a</sub>), 114.8 (C<sub>3</sub>), 56.6 (ArOCH<sub>3</sub>), 48.8 (C<sub>9</sub>), 36.6 (-NCH<sub>3</sub>).

**1-(4-Methylbenzyl)-3-(6,7-dimethyl-2H-chromene-2-one-4-yl)methylbenzimidazolium chloride (3b).** White solid, 1.85 g (83%). IR (cm<sup>-1</sup>): 1732 (C=O), 1609 (C=C), 1562 (C=N). <sup>1</sup>H NMR (300 MHz, DMSO-d<sub>6</sub>, 298 K): δ 10.18 (s, 1H, NCHN), 8.04 (m, 2H, H<sub>12</sub> and H<sub>15</sub>), 7.70 (s, 1H, H<sub>5</sub>), 7.68 (m, 2H, H<sub>13</sub> and H<sub>14</sub>), 7.48 (d, *J*<sub>H-H</sub>= 8.0 Hz, 2H, H<sub>o-tol.</sub>), 7.32 (s, 1H, H<sub>8</sub>), 7.24 (d, 2H, *J*<sub>H-H</sub>=8.0 Hz, H<sub>m-tol.</sub>), 6.21 (s, 2H, H<sub>9</sub>), 5.96 (s, 1H, H<sub>3</sub>), 5.78 (s, 2H, NCH<sub>2</sub>Ph), 2.36 and 2.34 (both s, 6H, H<sub>ArCH3</sub>), 2.30 (s, 3H, CH<sub>3tol.</sub>). <sup>13</sup>C{<sup>1</sup>H} NMR (75 MHz, DMSO-d<sub>6</sub>, 298 K): δ 159.6 (C=O), 151.4 (C<sub>8a</sub>), 148.5 (C<sub>4</sub>), 143.5 (NCHN), 142.7 (C<sub>7</sub>), 138.3 (C<sub>q,p-tol.</sub>), 133.2 and 131.4 (C<sub>10</sub> and C<sub>11</sub>), 131.1 (C<sub>6</sub>), 130.6 (NCH<sub>2</sub>C<sub>q</sub>), 129.5 (C<sub>m-tol.</sub>), 128.6 (C<sub>o-tol.</sub>), 127.1 and 126.9 (C<sub>13</sub> and C<sub>14</sub>), 124.5 (C<sub>8</sub>), 117.2 (C<sub>5</sub>), 114.5 (C<sub>4a</sub>), 114.2 and 113.9 (C<sub>12</sub> and C<sub>15</sub>), 111.9 (C<sub>3</sub>), 50.1 (NCH<sub>2</sub>Ph), 46.5 (C<sub>9</sub>), 20.7 (ArCH<sub>3-tol.</sub>), 19.7 (ArCH<sub>3-coumarin-7-pos.</sub>), 18.9 (ArCH<sub>3-coumarin-6-pos.</sub>).

**1-Butyl-3-((6,7-dimethyl-2H-chromene-2-one-4-yl)methyl)benzimidazolium chloride (3c).** White solid, 1.70 g (85%). IR (cm<sup>-1</sup>): 1726 (C=O), 1609 (C=C), 1566 (C=N). <sup>1</sup>H NMR (300 MHz, DMSO-d<sub>6</sub>, 298 K): δ 10.32 (s, 1H, NCHN), 8.21 and 8.05 (both m, 2H, H<sub>12</sub> and H<sub>15</sub>), 7.75 (s, 1H, H<sub>5</sub>), 7.72 (m, 2H, H<sub>13</sub> and H<sub>14</sub>), 7.32 (s, 1H, H<sub>8</sub>), 6.25 (s, 2H, H<sub>9</sub>), 5.96 (s, 1H, H<sub>3</sub>), 4.57 (t, *J*<sub>H-H</sub>= 7.2 Hz, 2H, NCH<sub>2</sub>CH<sub>2</sub>), 2.36 and 2.34 (both s, 6H, ArCH<sub>3</sub>), 1.96 (m, 2H, NCH<sub>2</sub>CH<sub>2</sub>), 1.39 (m, 2H, CH<sub>2</sub>CH<sub>3</sub>), 0.95 (t, *J*<sub>H-H</sub>= 7.3 Hz, 3H, CH<sub>2</sub>CH<sub>3</sub>). <sup>13</sup>C{<sup>1</sup>H} NMR (75 MHz, DMSO-d<sub>6</sub>, 298 K): δ 159.6 (C=O), 151.4 (C<sub>8a</sub>), 148.5 (C<sub>4</sub>), 143.4 (NCHN), 142.6 (C<sub>7</sub>), 133.2 and 131.4 (C<sub>10</sub> and C<sub>11</sub>), 131.2 (C<sub>6</sub>), 126.9 and 126.8 (C<sub>13</sub> and C<sub>14</sub>), 124.8 (C<sub>8</sub>), 117.1 (C<sub>5</sub>), 114.5 (C<sub>4a</sub>), 114.0 and 113.8 (C<sub>12</sub> and C<sub>15</sub>), 111.9 (C<sub>3</sub>), 46.8 (C<sub>9</sub>), 46.4 (NCH<sub>2</sub>), 30.3 (NCH<sub>2</sub>CH<sub>2</sub>), 19.7 (ArCH<sub>3-coumarin-7-pos.</sub>), 19.1 (CH<sub>2</sub>CH<sub>3</sub>), 18.8 (ArCH<sub>3-coumarin-6-pos.</sub>), 13.4 (CH<sub>2</sub>CH<sub>3</sub>).

### 3. Calculation of thermodynamic parameters

The thermodynamic parameters of the equilibria **TBPY-5**  $\rightleftharpoons$  **SP-4** for **4a**, **4e** and **5b** (Scheme S1) were obtained analysing the dependence of the  $^1\text{H}$  chemical shift of the H-3 hydrogen atom of the pyrone moiety in **4a**, **4e** and **5b** on the temperature (Table S1).

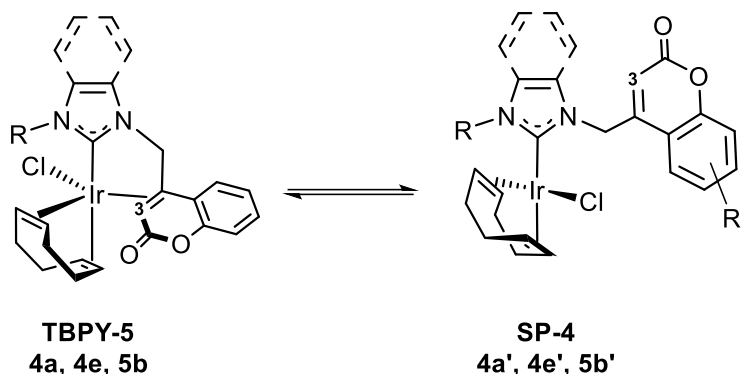

**4a**, imidazolin, R = Me, R' = 7,8-Me<sub>2</sub>  
**4e**, imidazolin, R = benzyl, R' = 7,8-Me<sub>2</sub>  
**5b**, benzimidazolin, R = benzyl-4-Me, R' = 6,7-Me<sub>2</sub>

**Scheme S1.** Equilibrium **TBPY-5**  $\rightleftharpoons$  **SP-4** for **4a**, **4e**, and **5b**.

**Table S1.**  $^1\text{H}$  chemical shifts ( $\delta_{\text{obs}}$ ) of the H-3 hydrogen atom of the pyrone moiety vs. temperature for **4a**, **4e** and **5b** in  $\text{CDCl}_3$ .

| T (K) | $\delta_{\text{obs}}$ ( <b>4a</b> ) | $\delta_{\text{obs}}$ ( <b>4e</b> ) | $\delta_{\text{obs}}$ ( <b>5b</b> ) |
|-------|-------------------------------------|-------------------------------------|-------------------------------------|
| 213   | 3.41                                | 3.52                                | 3.75                                |
| 303   | 4.65                                | 5.17                                | 5.17                                |
| 313   | 4.87                                | 5.39                                | 5.32                                |
| 323   | 5.05                                | 5.5                                 | 5.45                                |
| 333   | 5.21                                | 5.61                                | 5.54                                |
| 343   | 5.38                                | 5.7                                 | 5.61                                |
| 353   | -                                   | -                                   | 5.66                                |

Given the equilibrium **TBPY-5**  $\rightleftharpoons$  **SP-4** depicted in Scheme S1, the equilibrium constant  $K_{\text{eq}}$  is

$$K_{\text{eq}} = \frac{[\text{TBPY} - 5]}{[\text{SP} - 4]} = \frac{\chi_{\text{TBPY-5}}}{\chi_{\text{SP-4}}}$$

Provided that above 283 K the equilibrium is in fast exchange regime, the observed chemical shift  $\delta_{\text{obs}}$  of the H-3 hydrogen atom of the pyrone moiety at temperature higher than 283 K is:

$$\delta_{\text{obs}} = \chi_{\text{TBPY-5}} \cdot \delta_{\text{TBPY-5}} + \chi_{\text{SP-4}} \cdot \delta_{\text{SP-4}} \quad (a)$$

where  $\delta_{\text{TBPY-5}}$  and  $\delta_{\text{SP-4}}$  are the  $^1\text{H}$  chemical shift of the hydrogen atom H-3 of the pyrone moiety in the **TBPY-5** and the **SP-4** species, respectively.  $\delta_{\text{TBPY-5}}$  is straightforwardly observed in the  $^1\text{H}$  NMR spectrum at 213 K of **4a** (3.41 ppm), **4e** (3.52 ppm), and **5b** (3.75 ppm), where the equilibrium is in slow exchange regime and only the pentacoordinated isomer **TBPY-5** is detected. On the contrary,  $\delta_{\text{SP-4}}$  was obtained as a result of the fitting analysis (*vide infra*).

Thus,  $\delta_{obs}$  can be expressed as a function of  $K_{eq}$ :

$$\delta_{obs} = \chi_{TBPY-5} \cdot \delta_{TBPY-5} + \chi_{SP-4} \cdot \delta_{SP-4} = \frac{1}{1 + K_{eq}} \cdot (\delta_{TBPY-5} + K_{eq} \cdot \delta_{SP-4}) \quad (b)$$

and eventually as a function of  $\Delta H_r$  and  $\Delta S_r$ .

$$\delta_{obs} = \frac{1}{1 + e^{\left(-\frac{\Delta H_r}{RT} + \frac{\Delta S_r}{R}\right)}} \cdot \left(\delta_{TBPY-5} + \delta_{SP-4} \cdot e^{\left(-\frac{\Delta H_r}{RT} + \frac{\Delta S_r}{R}\right)}\right) \quad (c)$$

Figure S1 shows the plot  $\delta_{obs}$  vs. T for **4a**, **4e**, and **5b** and the fitting curves (equation c) along with the calculated parameters  $\Delta H_r$ ,  $\Delta S_r$  and  $\delta_{SP-4}$ , taking  $\delta_{TBPY-5} = 3.75$  ppm (**5b**), 3.41 (**4a**), 3.52 (**4e**) ppm (*cf.* Table S1).

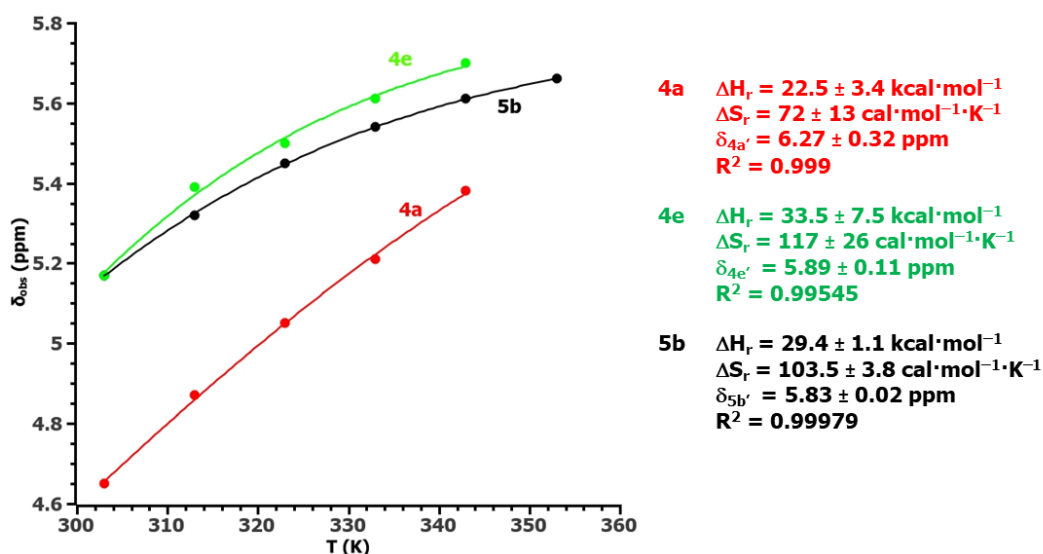

**Figure S1.** Scatter plot of the  $^1\text{H}$  chemical shifts ( $\delta_{obs}$ ) of the H-3 hydrogen atom of the pyrone moiety vs. temperature for **4a** (red), **4e** (green) and **5b** (black) along with the fitted curves according to equation c (*vide infra*).

For the sake of comparison, Table S2 shows the calculated  $K_{eq}$  in the range 213-353 K along with the calculated molar fraction of the **TBPY-5** and **SP-4** isomers for **4a**, **4e**, and **5b**. Remarkably, in all the cases, at 213 K the **TBPY-5** isomer is almost the only species present in solution ( $\chi_{TBPY-5} \geq 0.98$ ) whereas at 343 K the **SP-4** isomer is the major species.

**Table S2.** Calculated  $K_{eq}$ ,  $\chi_{TBPY-5}$  and  $\chi_{SP-4}$  for the equilibrium **TBPY-5**  $\rightleftharpoons$  **SP-4** at different temperatures.

| T (K) | 4a       |                 |               | 4e       |                 |               | 5b       |                 |               |
|-------|----------|-----------------|---------------|----------|-----------------|---------------|----------|-----------------|---------------|
|       | $K_{eq}$ | $\chi_{TBPY-5}$ | $\chi_{SP-4}$ | $K_{eq}$ | $\chi_{TBPY-5}$ | $\chi_{SP-4}$ | $K_{eq}$ | $\chi_{TBPY-5}$ | $\chi_{SP-4}$ |
| 213   | 0.018    | 0.98            | 0.02          | 0.008    | 0.99            | 0.01          | 0.016    | 0.98            | 0.02          |
| 243   | 0.084    | 0.92            | 0.08          | 0.081    | 0.92            | 0.08          | 0.122    | 0.89            | 0.11          |
| 293   | 0.562    | 0.64            | 0.36          | 1.38     | 0.42            | 0.58          | 1.46     | 0.41            | 0.59          |
| 333   | 1.704    | 0.37            | 0.63          | 7.19     | 0.12            | 0.88          | 6.23     | 0.14            | 0.86          |
| 353   | 2.701    | 0.27            | 0.73          | 14.3     | 0.07            | 0.93          | 11.4     | 0.08            | 0.92          |

#### 4. Variable-temperature NMR spectra

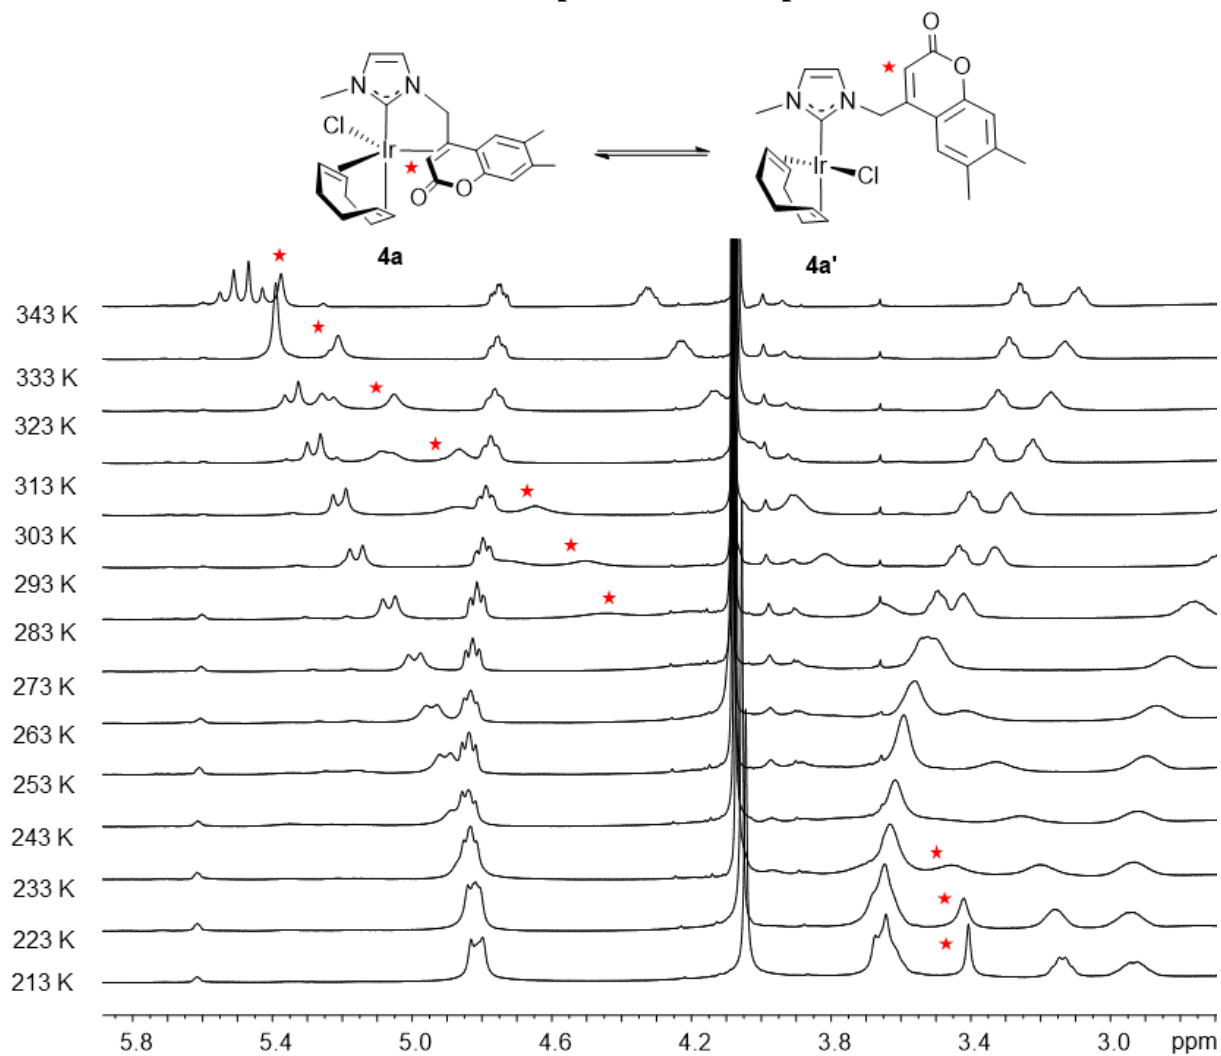

Figure S2. Stacked <sup>1</sup>H NMR spectra of **4a**⇌**4a'** in CDCl<sub>3</sub> at different temperatures.

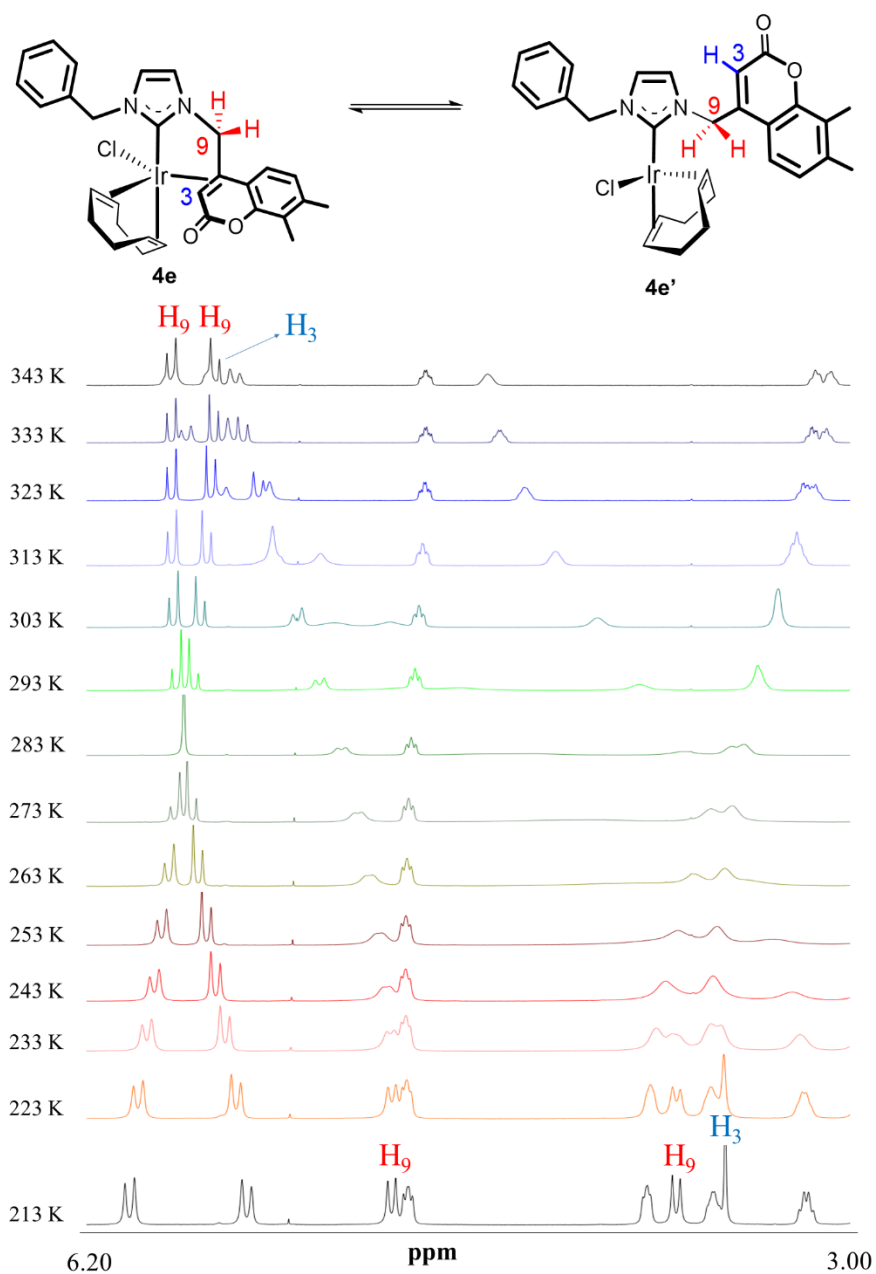

**Figure S3.** Stacked  $^1H$  NMR spectra of  $4e \rightleftharpoons 4e'$  in  $CDCl_3$  at different temperatures.

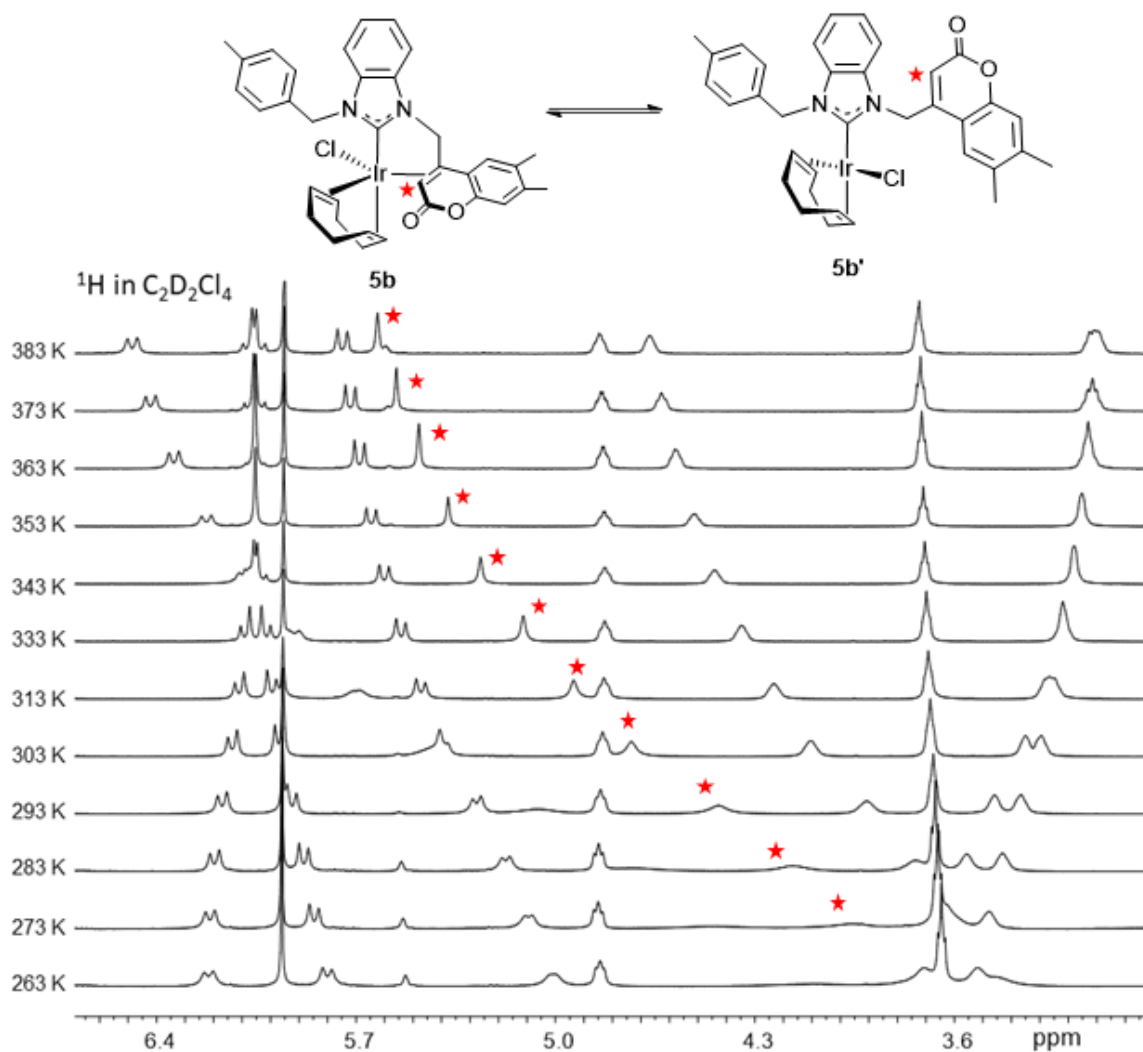

**Figure S4.** Stacked  $^1\text{H}$  NMR spectra of  $5\text{b} \rightleftharpoons 5\text{b}'$  in  $\text{C}_2\text{D}_2\text{Cl}_4$  at different temperatures.

### 5. NMR spectra of coumarin-functionalized azolium salts and Ir-NHC complexes

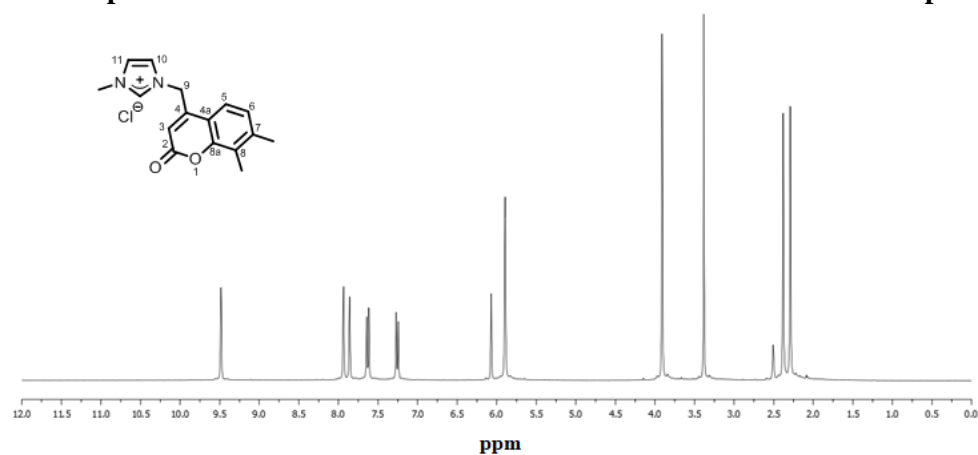

**Figure S5.**  $^1\text{H}$  NMR spectrum of  $2\text{a}$  in  $\text{DMSO-}d_6$  at 298 K.



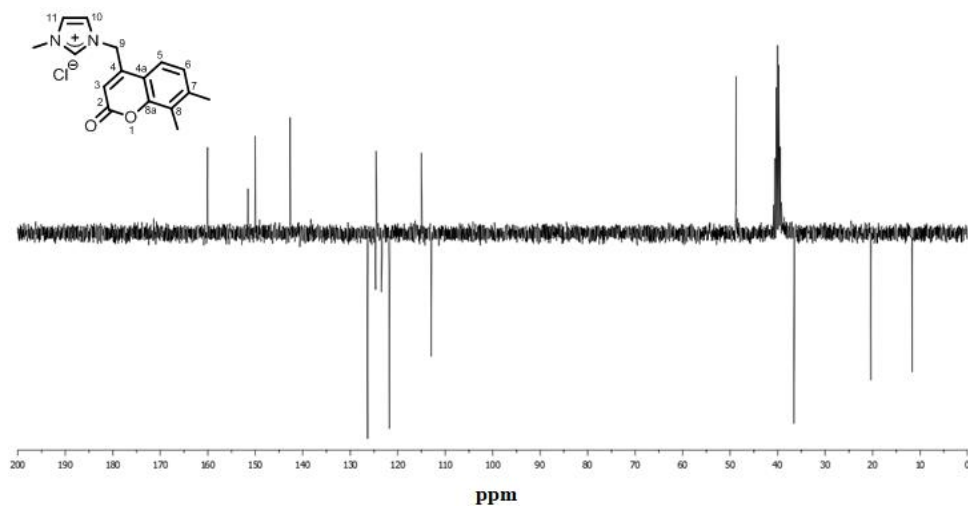

**Figure S6.**  $^{13}\text{C}\{^1\text{H}\}$ -APT NMR spectrum of **2a** in  $\text{DMSO-}d_6$  at 298 K.

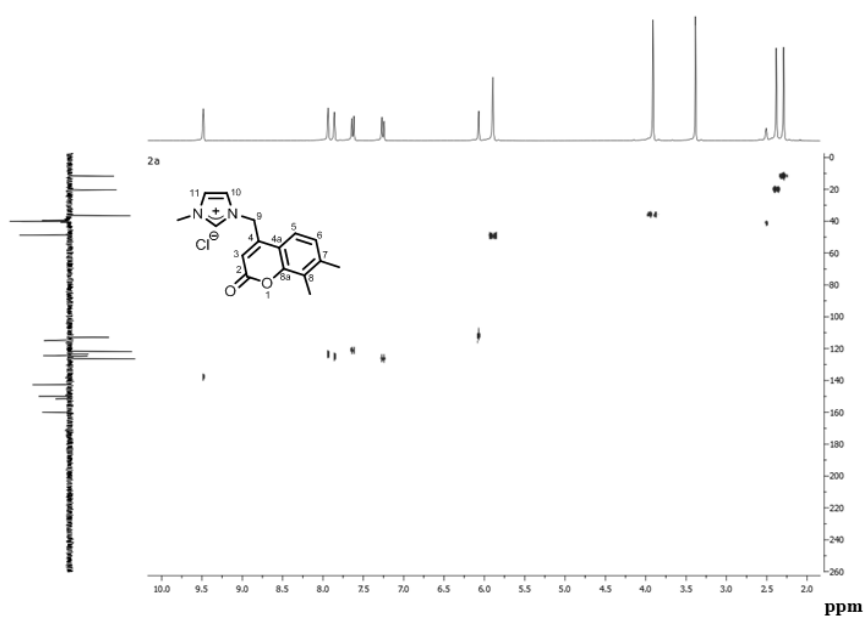

**Figure S7.**  $^{13}\text{C-}^1\text{H}$  HSQC spectrum of **2a** in  $\text{DMSO-}d_6$  at 298 K.

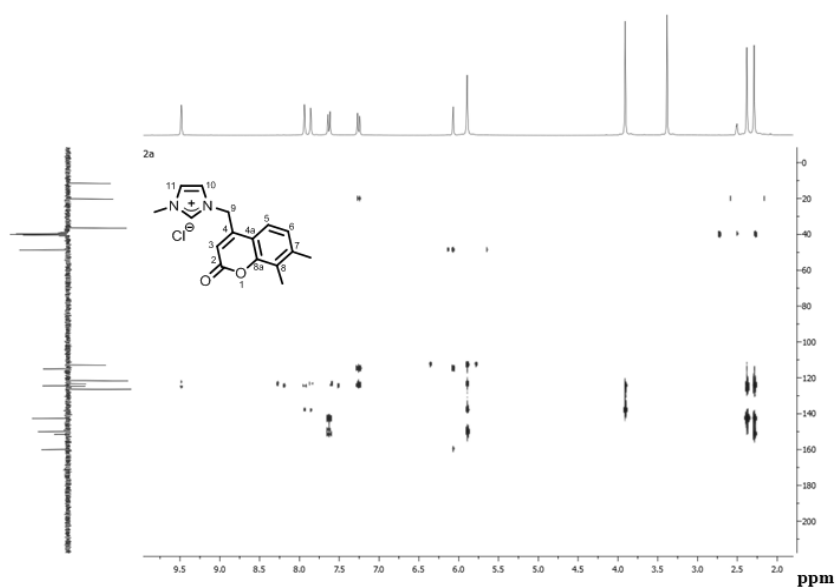

**Figure S8.**  $^{13}\text{C-}^1\text{H}$  HMBC spectrum of **2a** in  $\text{DMSO-}d_6$  at 298 K.

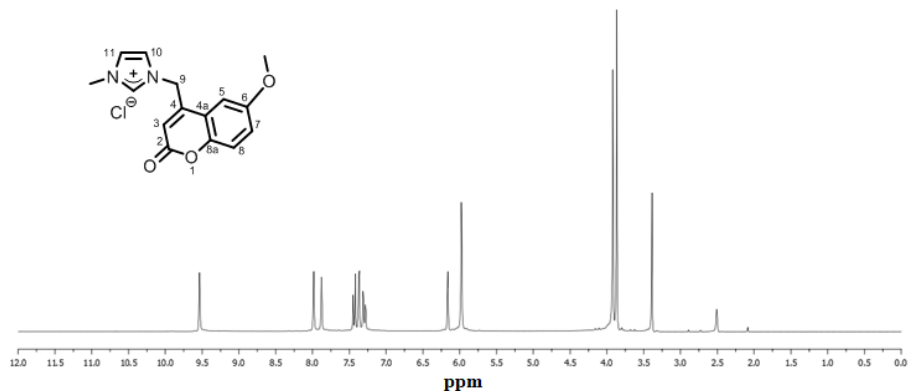

**Figure S9.**  $^1\text{H}$  NMR spectrum of **2b** in  $\text{DMSO-}d_6$  at 298 K.

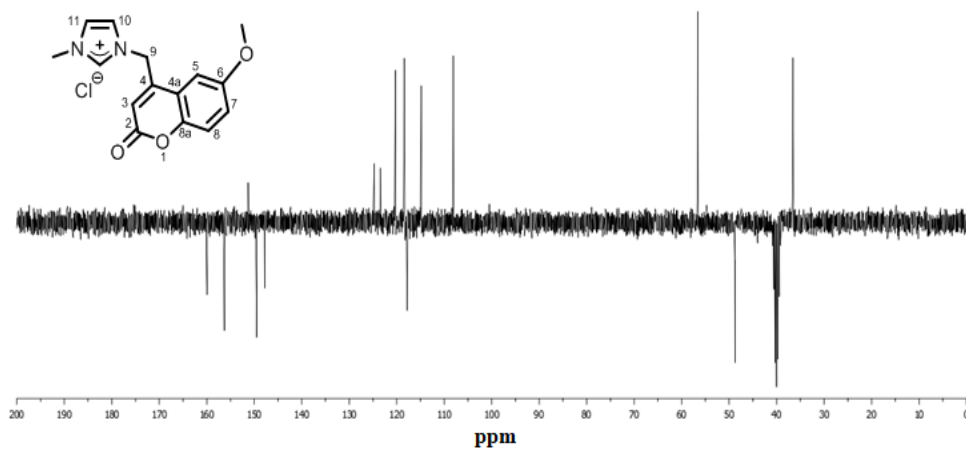

**Figure S10.**  $^{13}\text{C}\{^1\text{H}\}$ -APT NMR spectrum of **2b** in  $\text{DMSO-}d_6$  at 298 K.

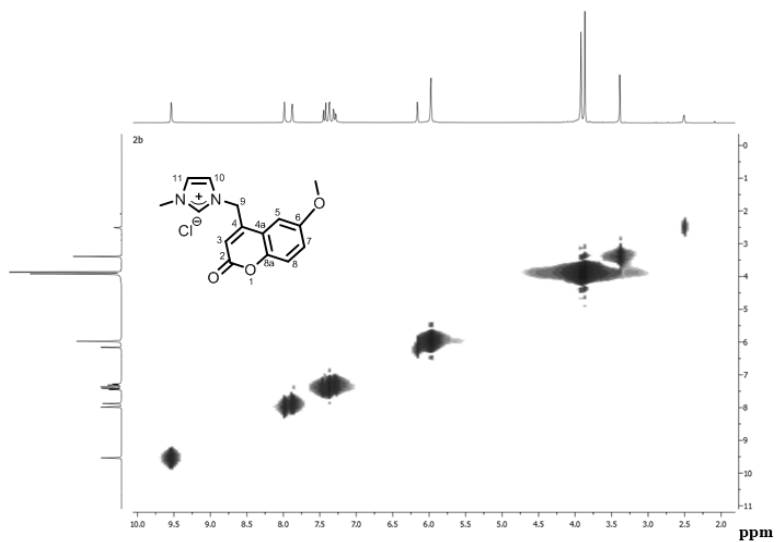

**Figure S11.**  $^1\text{H}$ - $^1\text{H}$  COSY spectrum of **2b** in  $\text{DMSO-}d_6$  at 298 K.

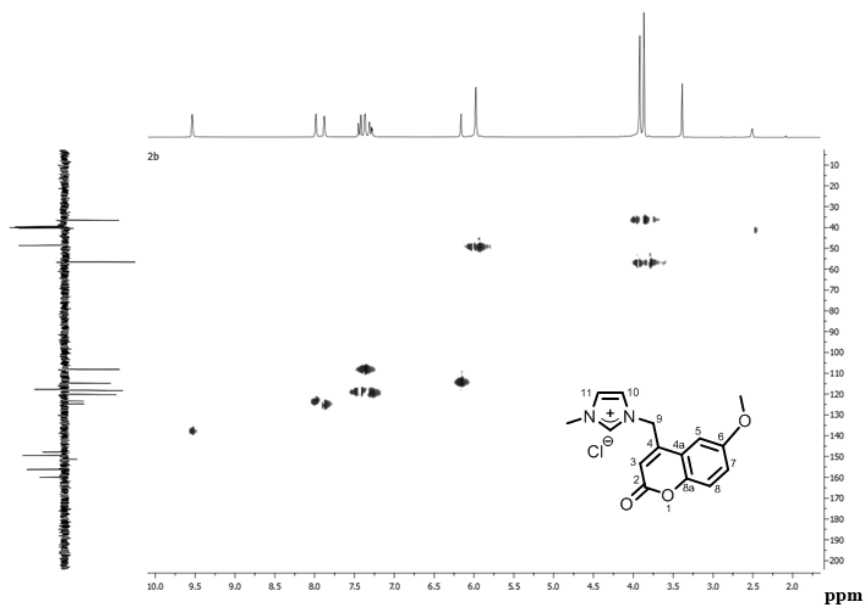

Figure S12.  $^{13}\text{C}$ - $^1\text{H}$  HSQC spectrum of **2b** in  $\text{DMSO-}d_6$  at 298 K.

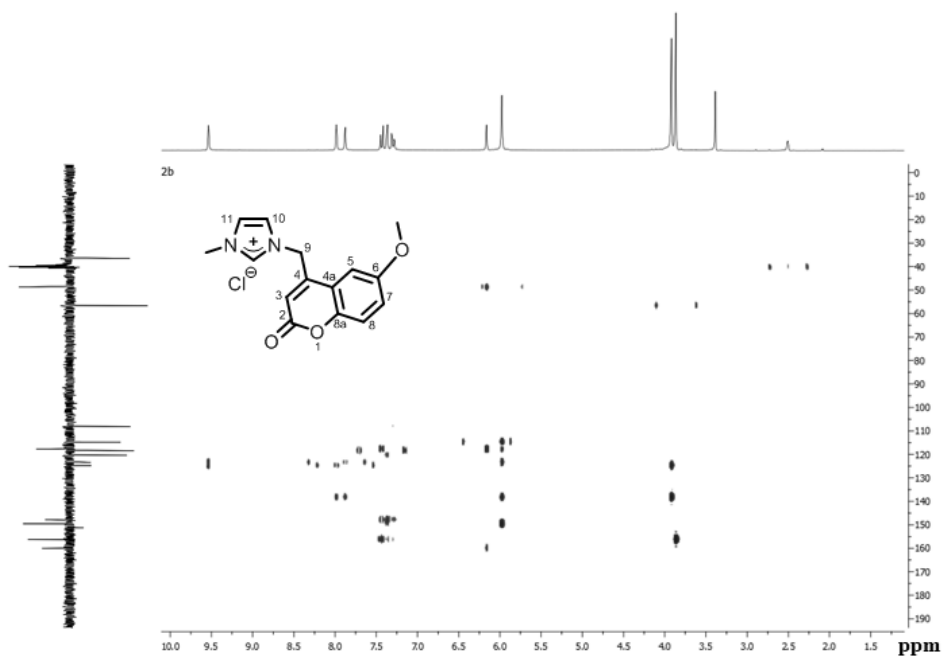

Figure S13.  $^{13}\text{C}$ - $^1\text{H}$  HMBC spectrum of **2b** in  $\text{DMSO-}d_6$  at 298 K.

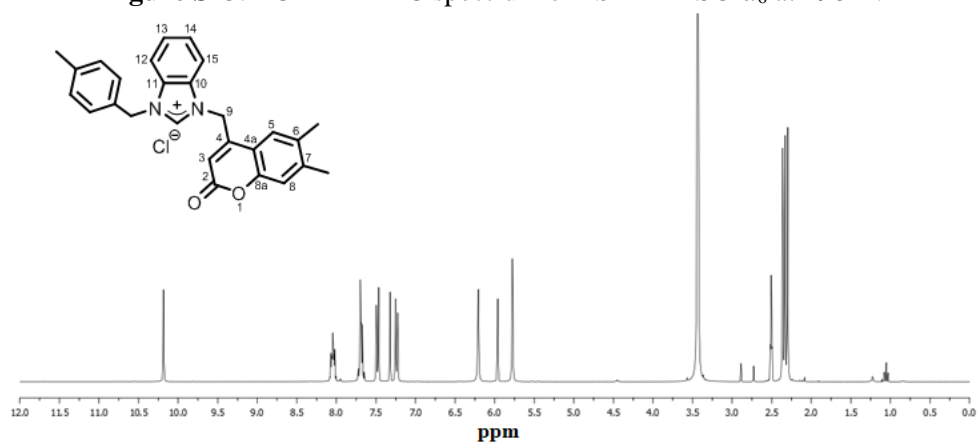

Figure S14.  $^1\text{H}$  NMR spectrum of **3b** in  $\text{DMSO-}d_6$  at 298 K.

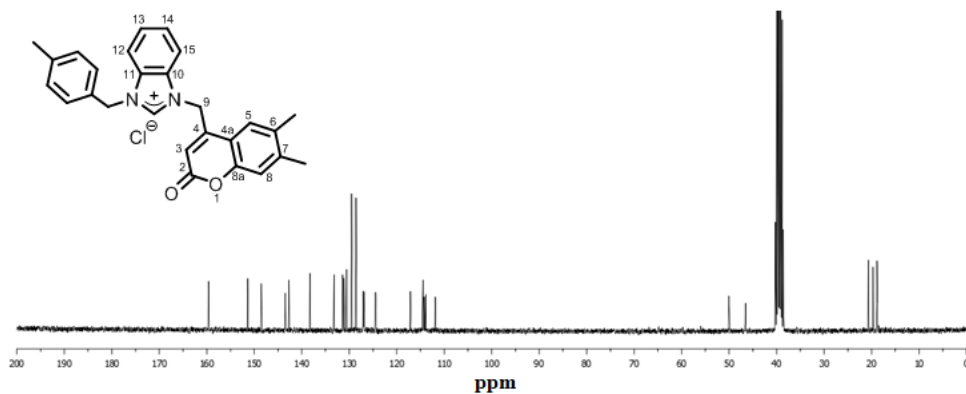

**Figure S15.**  $^{13}\text{C}\{^1\text{H}\}$  NMR spectrum of **3b** in  $\text{DMSO-}d_6$  at 298 K.

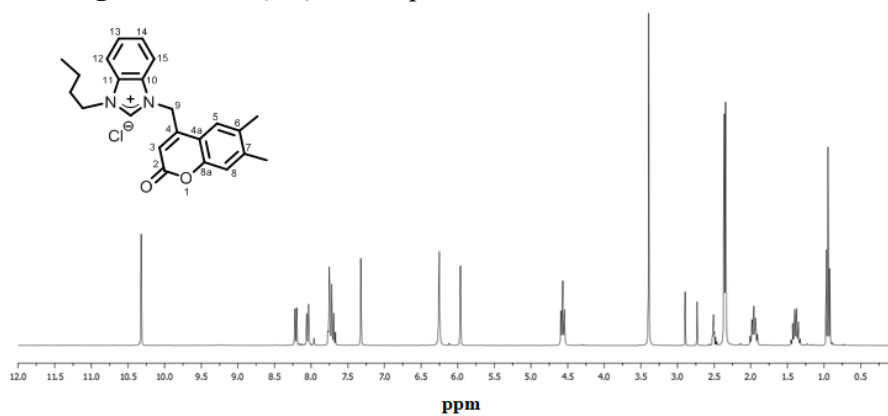

**Figure S16.**  $^1\text{H}$  NMR spectrum of **3c** in  $\text{DMSO-}d_6$  at 298 K.

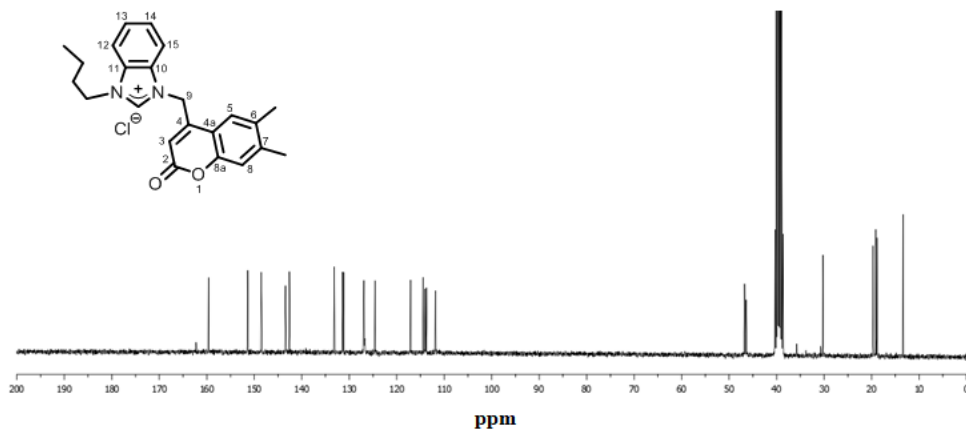

**Figure S17.**  $^{13}\text{C}\{^1\text{H}\}$  NMR spectrum of **3c** in  $\text{DMSO-}d_6$  at 298 K.

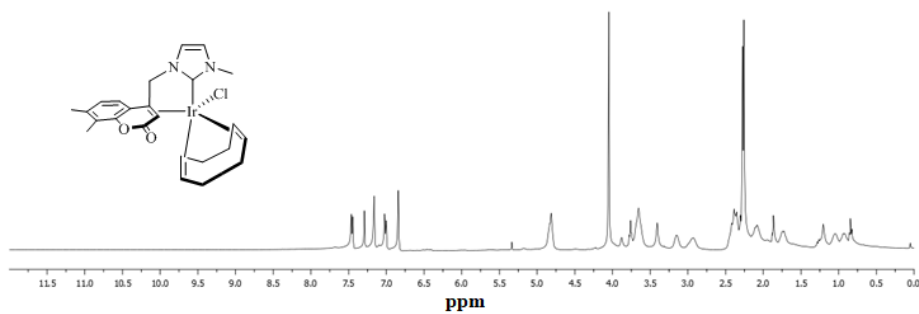

**Figure S18.**  $^1\text{H}$  NMR spectrum of **4a** in  $\text{CDCl}_3$  at 213 K.

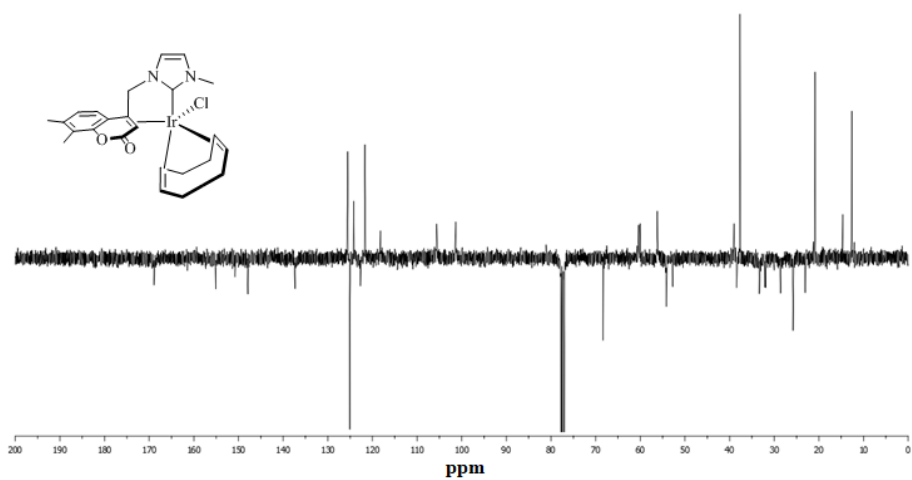

**Figure S19.**  $^{13}\text{C}\{^1\text{H}\}$ -APT NMR spectrum of **4a** in  $\text{CDCl}_3$  at 213 K.

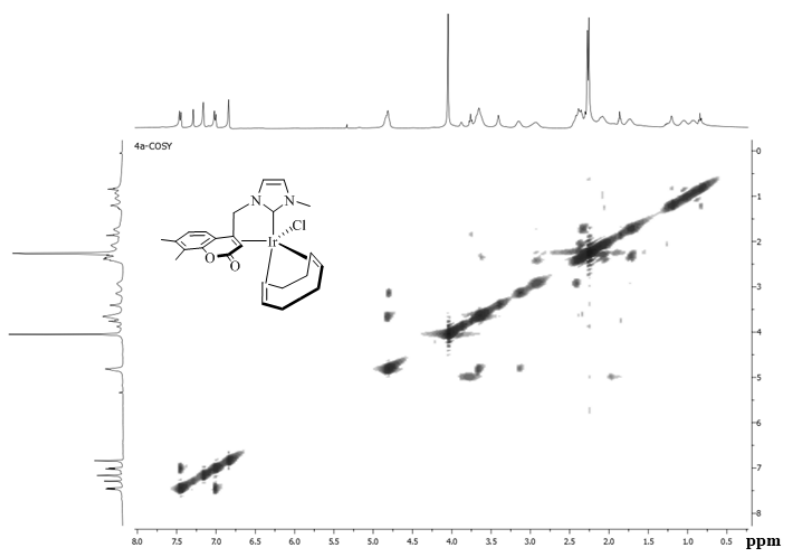

**Figure S20.**  $^1\text{H}$ - $^1\text{H}$  COSY spectrum of **4a** in  $\text{CDCl}_3$  at 213 K.

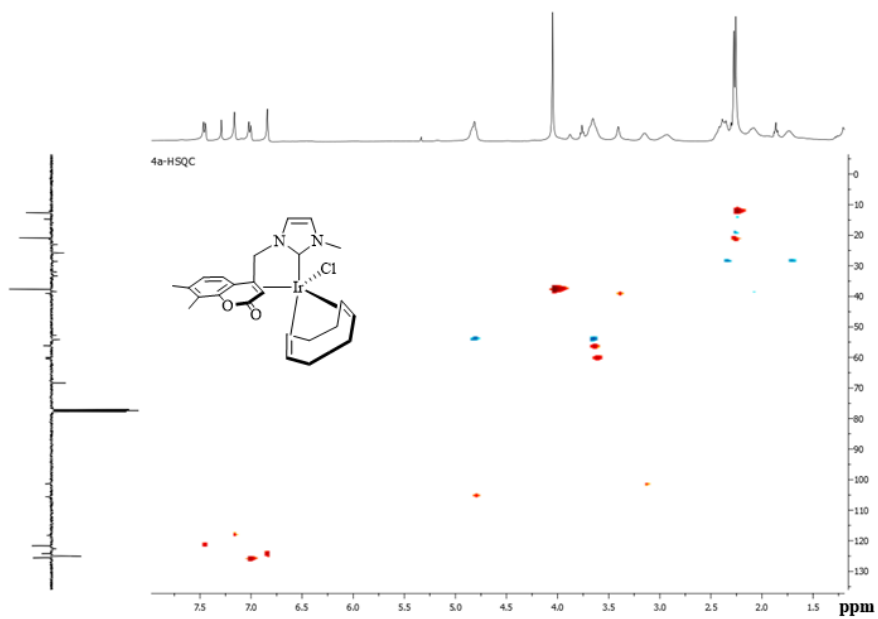

**Figure S21.**  $^{13}\text{C}$ - $^1\text{H}$  HSQC spectrum of **4a** in  $\text{CDCl}_3$  at 213 K.

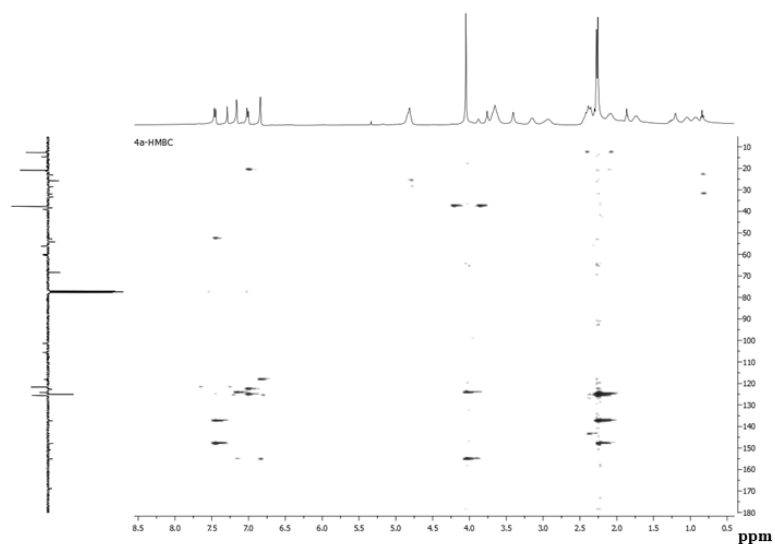

**Figure S22.**  $^{13}\text{C}$ - $^1\text{H}$  HMBC spectrum of **4a** in  $\text{CDCl}_3$  at 213 K.

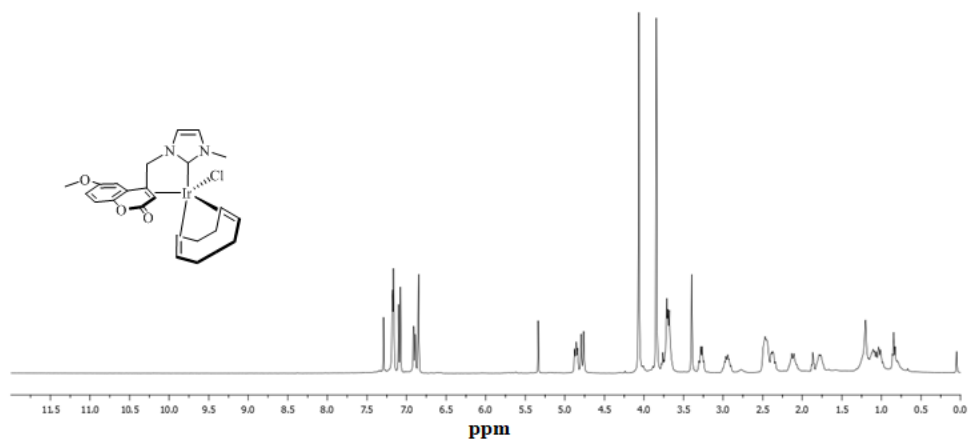

**Figure S23.**  $^1\text{H}$  NMR spectrum of **4b** in  $\text{CDCl}_3$  at 213 K.

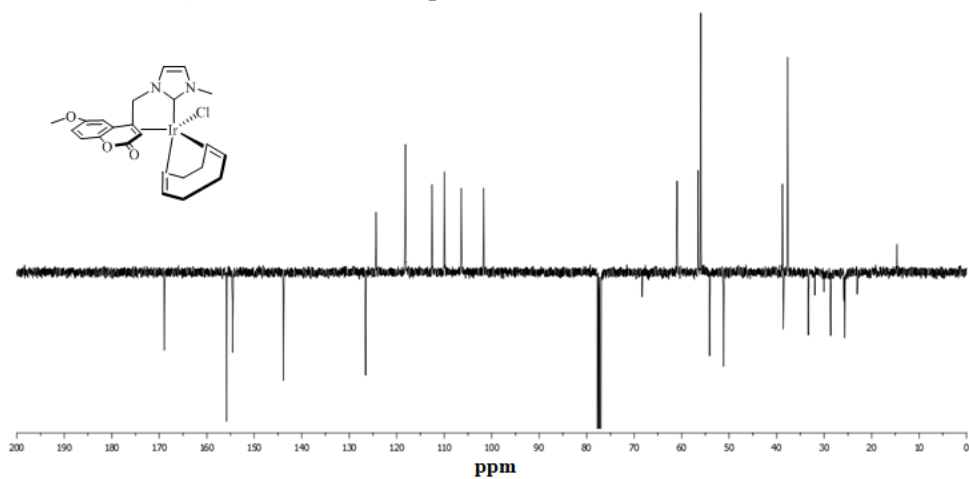

**Figure S24.**  $^{13}\text{C}\{^1\text{H}\}$ -APT NMR spectrum of **4b** in  $\text{CDCl}_3$  at 213 K.

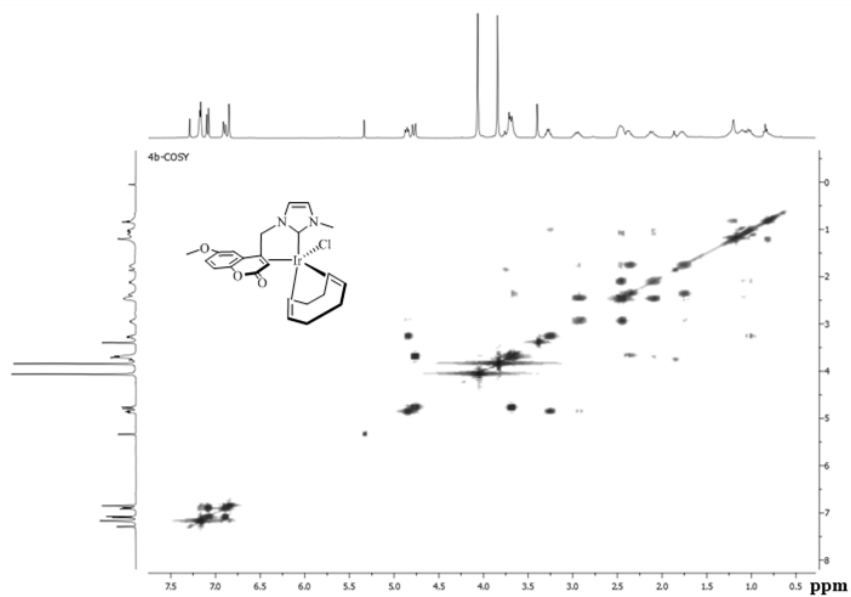

Figure S25.  $^1\text{H}$ - $^1\text{H}$  COSY spectrum of **4b** in  $\text{CDCl}_3$  at 213 K.

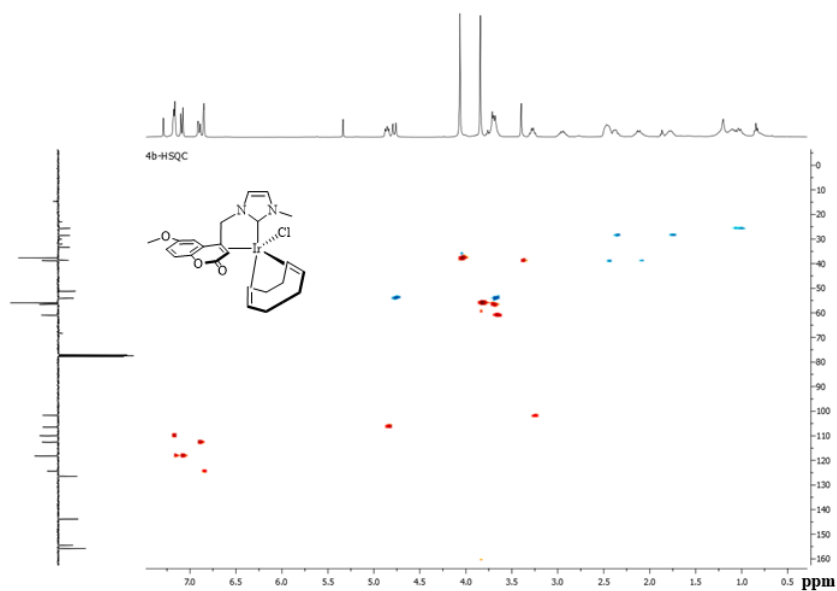

Figure S26.  $^{13}\text{C}$ - $^1\text{H}$  HSQC spectrum of **4b** in  $\text{CDCl}_3$  at 213 K.

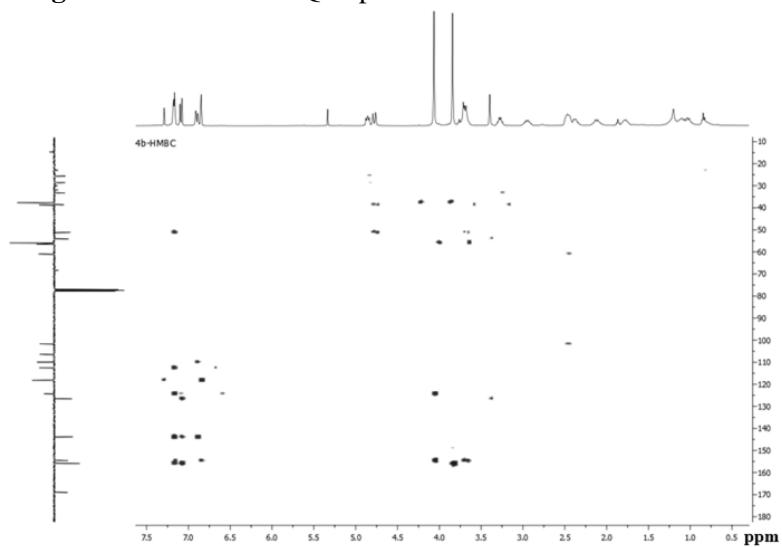

Figure S27.  $^{13}\text{C}$ - $^1\text{H}$  HMBC spectrum of **4b** in  $\text{CDCl}_3$  at 213 K.

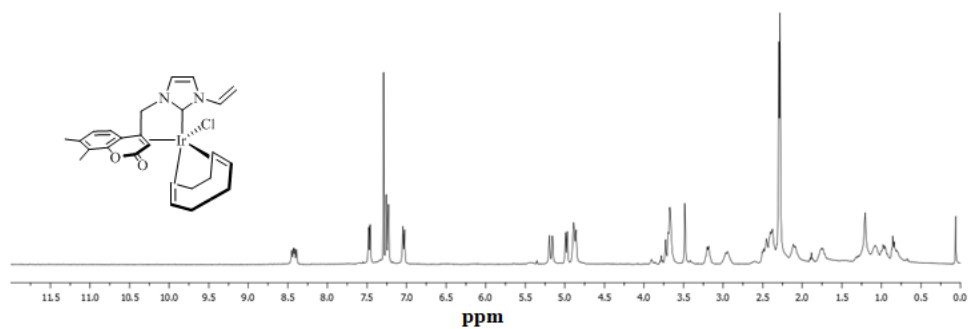

**Figure S28.**  $^1\text{H}$  NMR spectrum of **4c** in  $\text{CDCl}_3$  at 213 K.

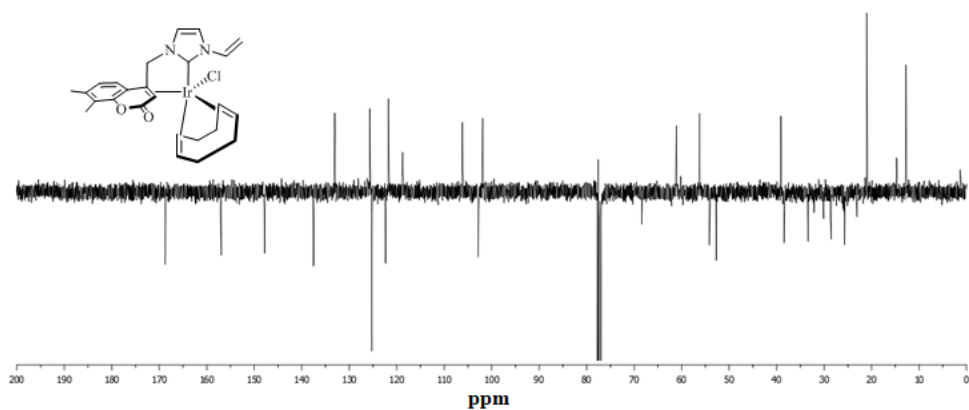

**Figure S29.**  $^{13}\text{C}\{^1\text{H}\}$ -APT NMR spectrum of **4c** in  $\text{CDCl}_3$  at 213 K.

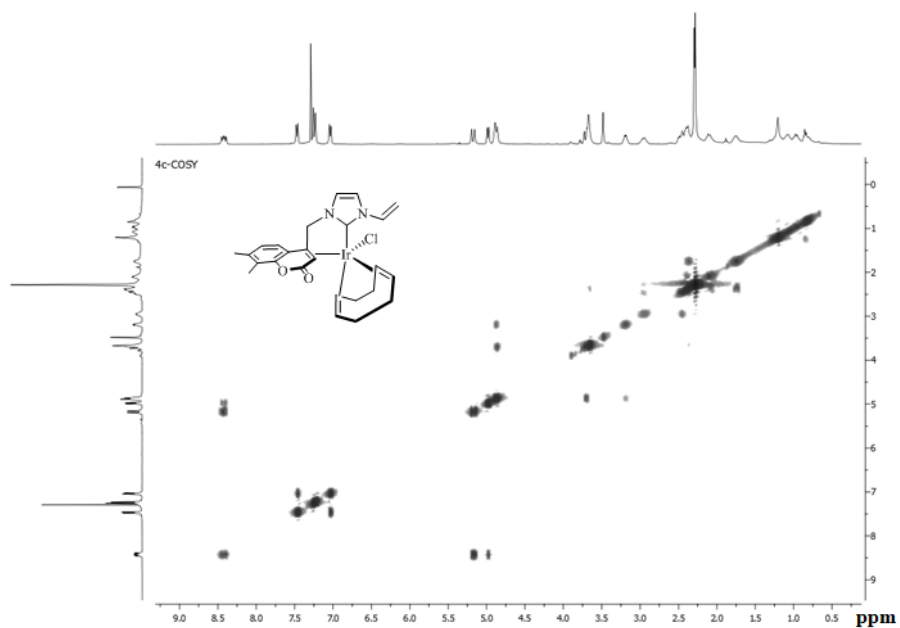

**Figure S30.**  $^1\text{H}$ - $^1\text{H}$  COSY spectrum of **4c** in  $\text{CDCl}_3$  at 213 K.



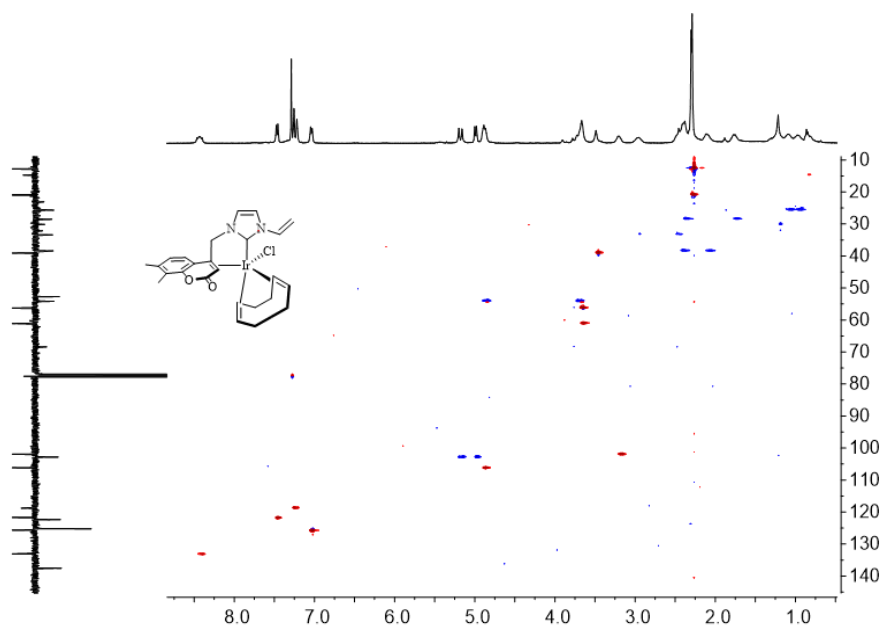

**Figure S31.**  $^{13}\text{C}$ - $^1\text{H}$  HSQC spectrum of **4c** in  $\text{CDCl}_3$  at 213 K.

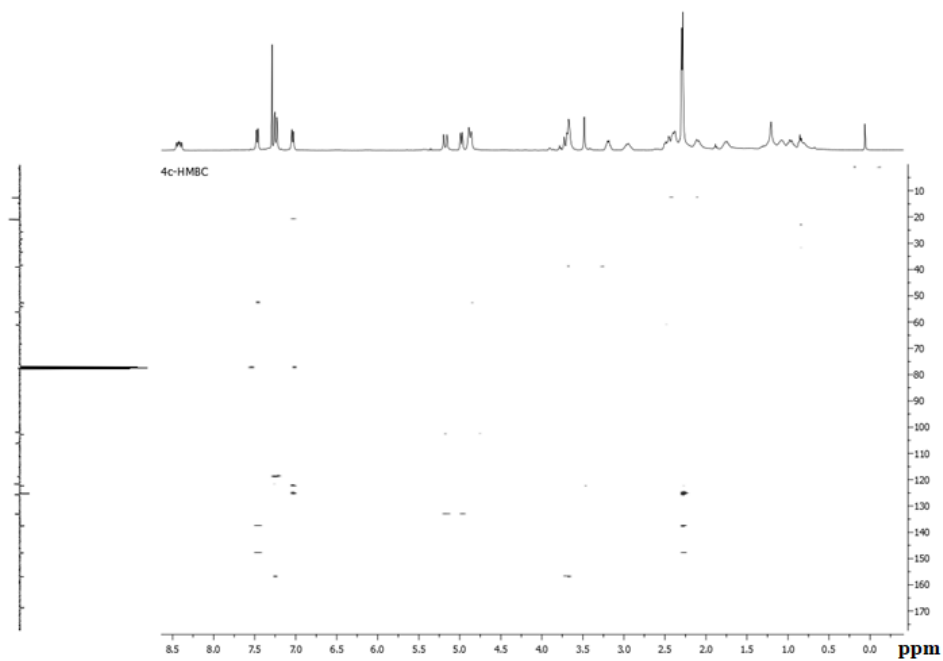

**Figure S32.**  $^{13}\text{C}$ - $^1\text{H}$  HMBC spectrum of **4c** in  $\text{CDCl}_3$  at 213 K.

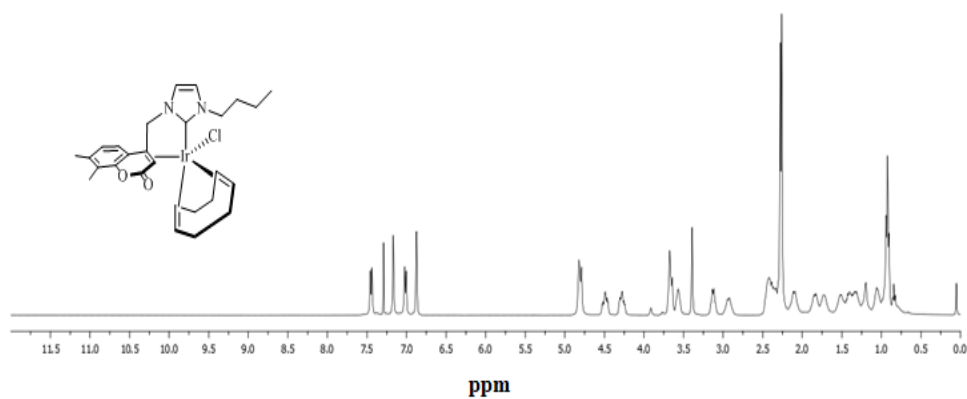

**Figure S33.**  $^1\text{H}$  NMR spectrum of **4d** in  $\text{CDCl}_3$  at 213 K.

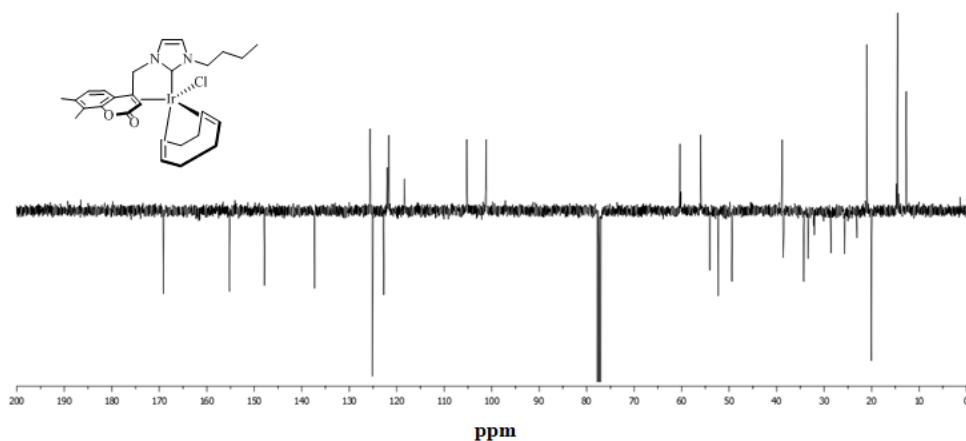

**Figure S34.**  $^{13}\text{C}\{^1\text{H}\}$ -APT NMR spectrum of **4d** in  $\text{CDCl}_3$  at 213 K.

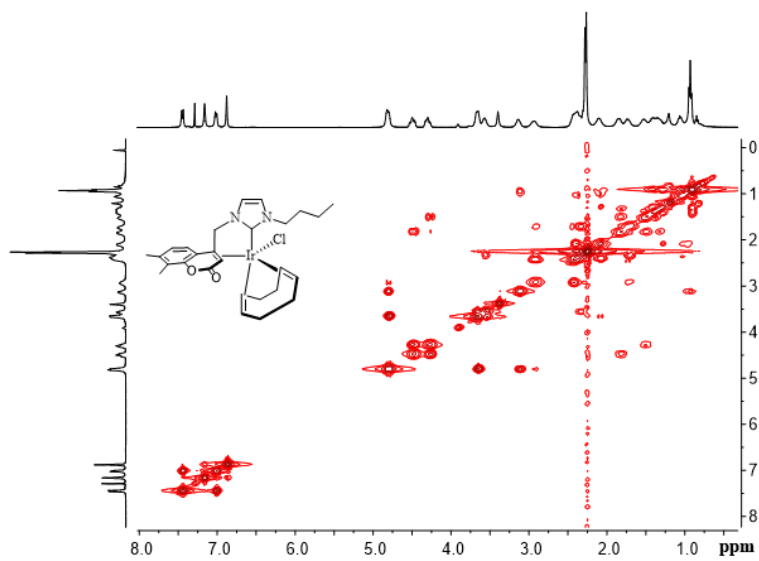

**Figure S35.**  $^1\text{H}$ - $^1\text{H}$  COSY spectrum of **4d** in  $\text{CDCl}_3$  at 213 K.

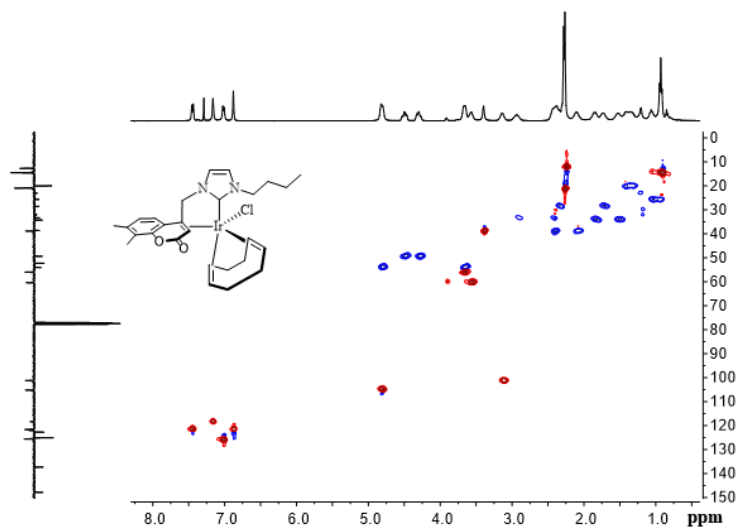

**Figure S36.**  $^{13}\text{C}$ - $^1\text{H}$  HSQC spectrum of **4d** in  $\text{CDCl}_3$  at 213 K.

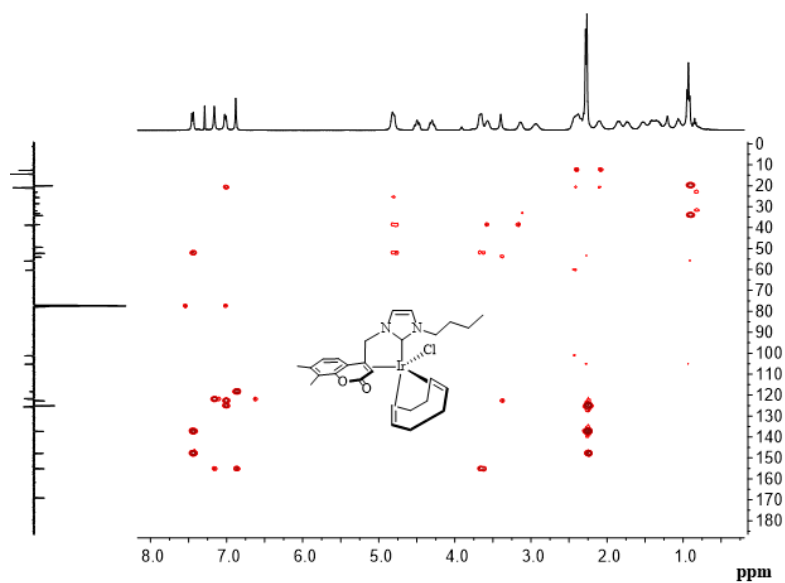

**Figure S37.**  $^{13}\text{C}$ - $^1\text{H}$  HMBC spectrum of **4d** in  $\text{CDCl}_3$  at 213 K.

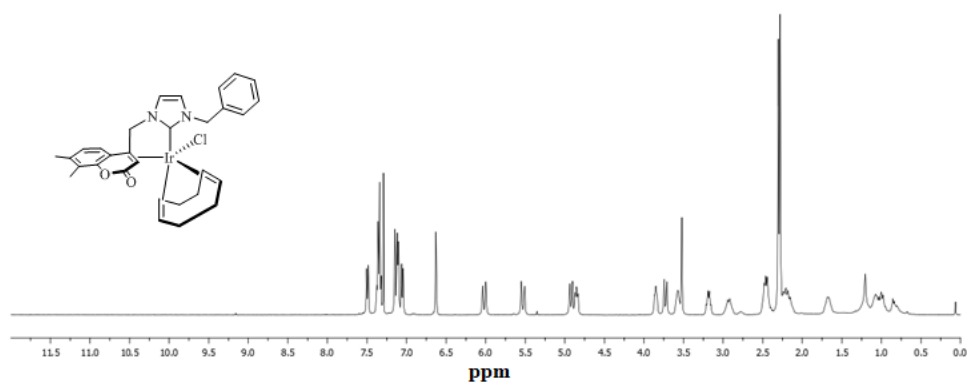

**Figure S38.**  $^1\text{H}$  NMR spectrum of **4e** in  $\text{CDCl}_3$  at 213 K.

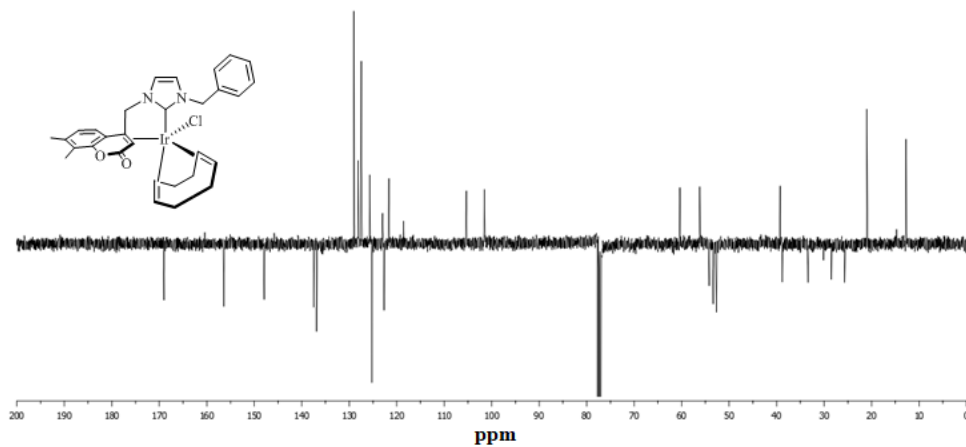

**Figure S39.**  $^{13}\text{C}\{^1\text{H}\}$ -APT NMR spectrum of **4e** in  $\text{CDCl}_3$  at 213 K.

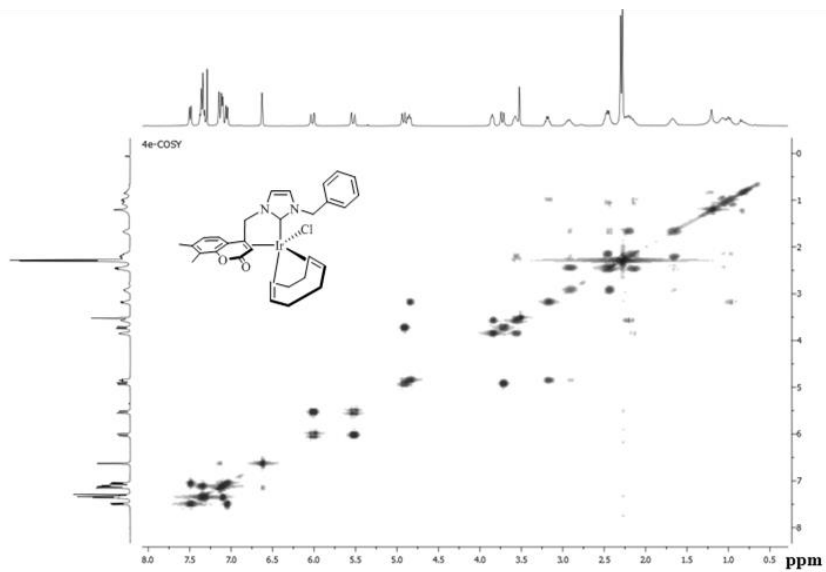

**Figure S40.**  $^1\text{H}$ - $^1\text{H}$  COSY spectrum of **4e** in  $\text{CDCl}_3$  at 213 K.

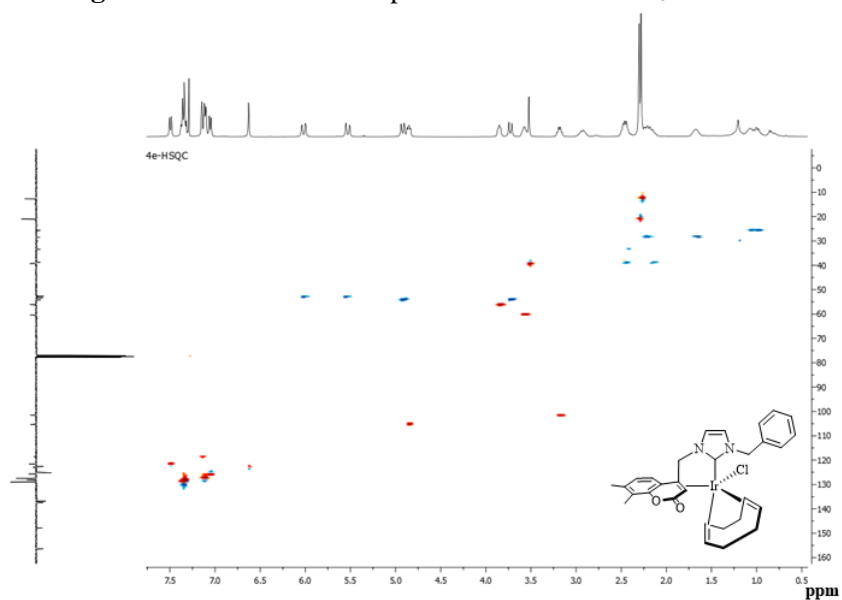

**Figure S41.**  $^{13}\text{C}$ - $^1\text{H}$  HSQC spectrum of **4e** in  $\text{CDCl}_3$  at 213 K.

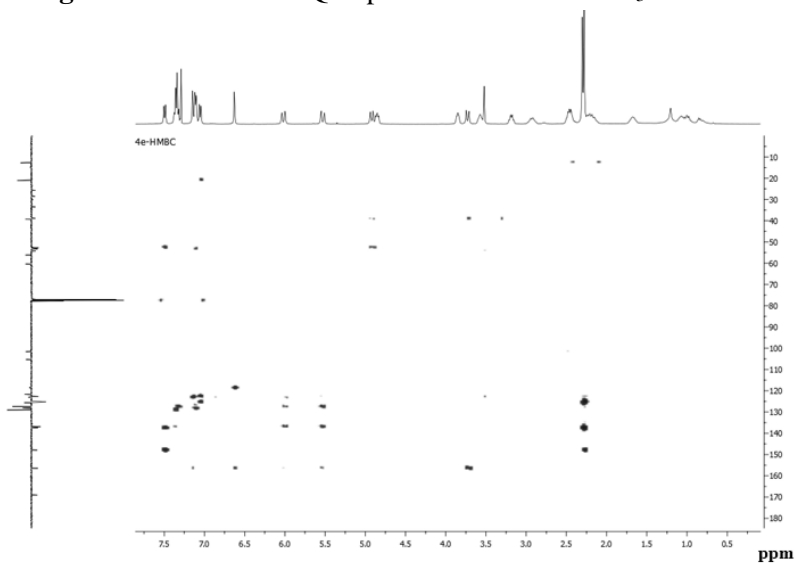

**Figure S42.**  $^{13}\text{C}$ - $^1\text{H}$  HMBC spectrum of **4e** in  $\text{CDCl}_3$  at 213 K.

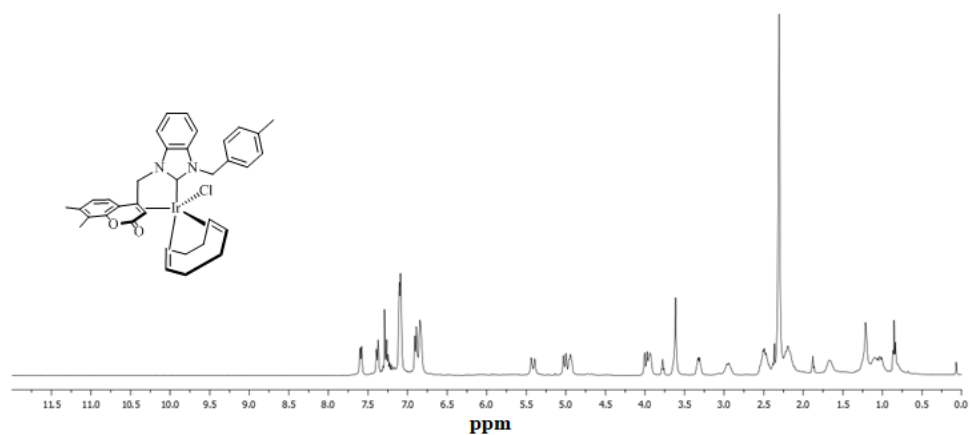

**Figure S43.**  $^1\text{H}$  NMR spectrum of **5a** in  $\text{CDCl}_3$  at 213 K.

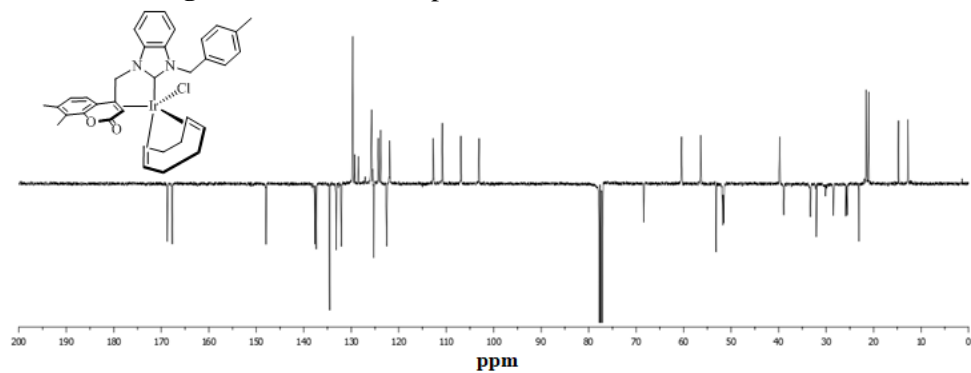

**Figure S44.**  $^{13}\text{C}\{^1\text{H}\}$ -APT NMR spectrum of **5a** in  $\text{CDCl}_3$  at 213 K.

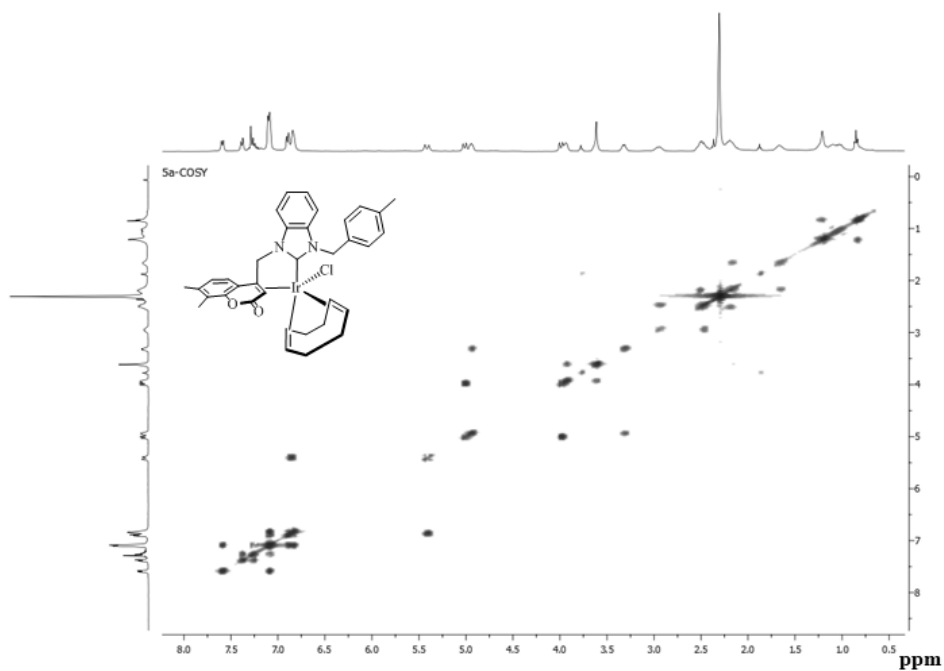

**Figure S45.**  $^1\text{H}$ - $^1\text{H}$  COSY spectrum of **5a** in  $\text{CDCl}_3$  at 213 K.

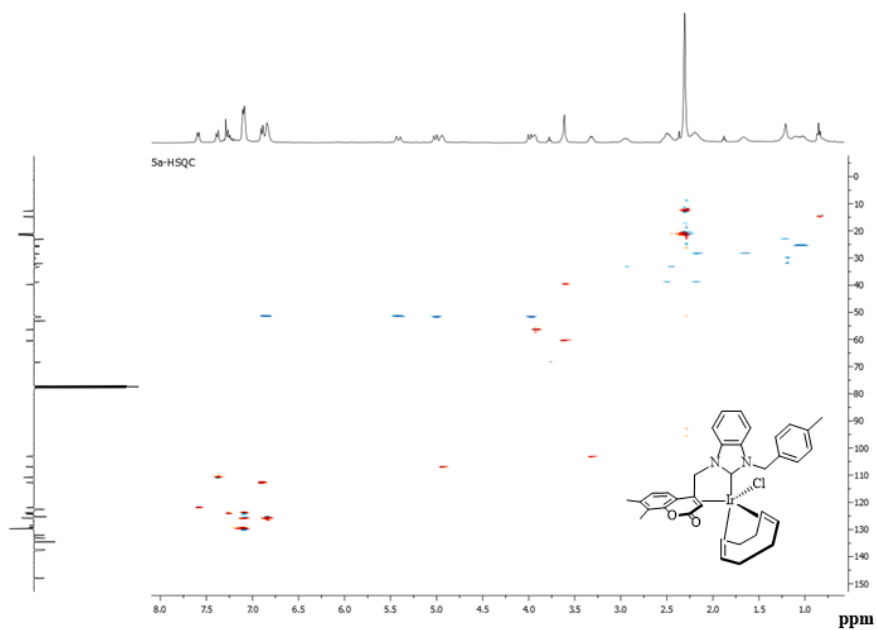

**Figure S46.**  $^{13}\text{C}$ - $^1\text{H}$  HSQC spectrum of **5a** in  $\text{CDCl}_3$  at 213 K.

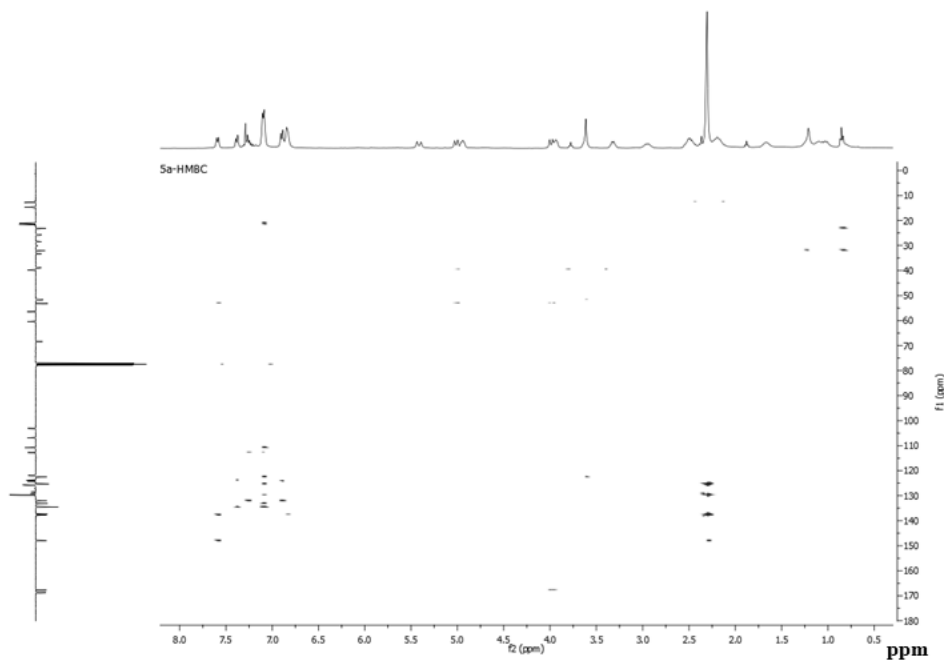

**Figure S47.**  $^{13}\text{C}$ - $^1\text{H}$  HMBC spectrum of **5a** in  $\text{CDCl}_3$  at 213 K.

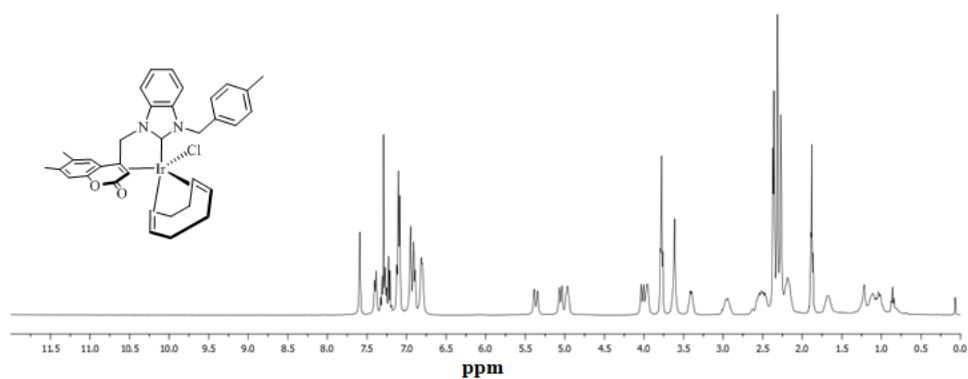

**Figure S48.**  $^1\text{H}$  NMR spectrum of **5b** in  $\text{CDCl}_3$  at 213 K.

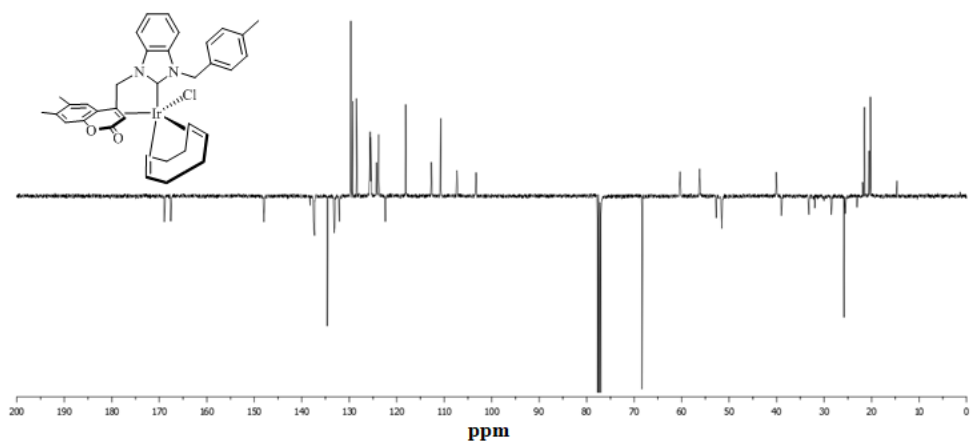

**Figure S49.**  $^{13}\text{C}\{^1\text{H}\}$ -APT NMR spectrum of **5b** in  $\text{CDCl}_3$  at 213 K.

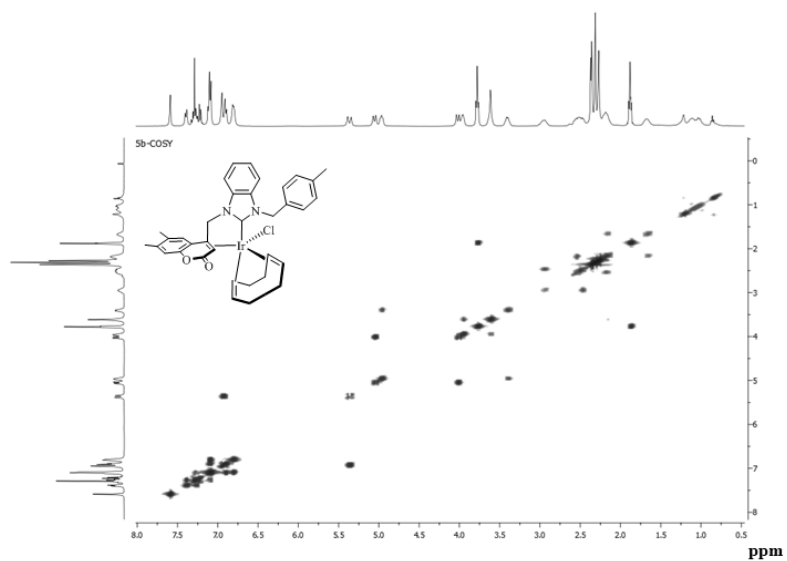

**Figure S50.**  $^1\text{H}$ - $^1\text{H}$  COSY spectrum of **5b** in  $\text{CDCl}_3$  at 213 K.

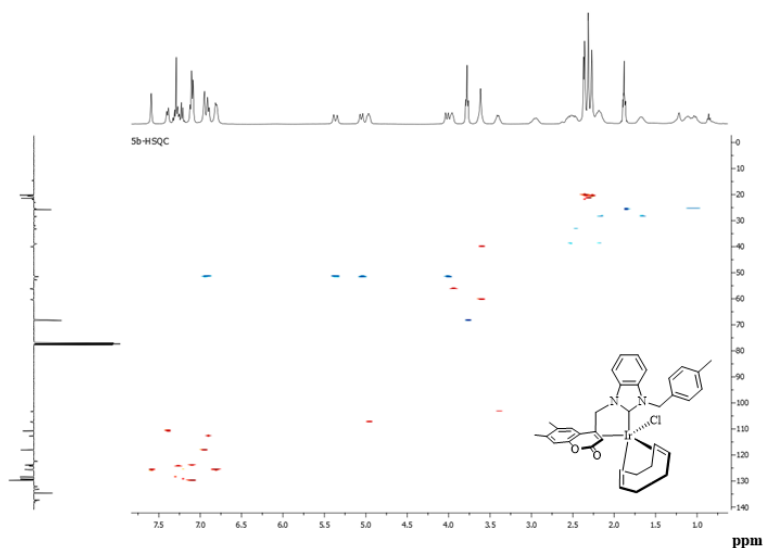

**Figure S51.**  $^{13}\text{C}$ - $^1\text{H}$  HSQC spectrum of **5b** in  $\text{CDCl}_3$  at 213 K.

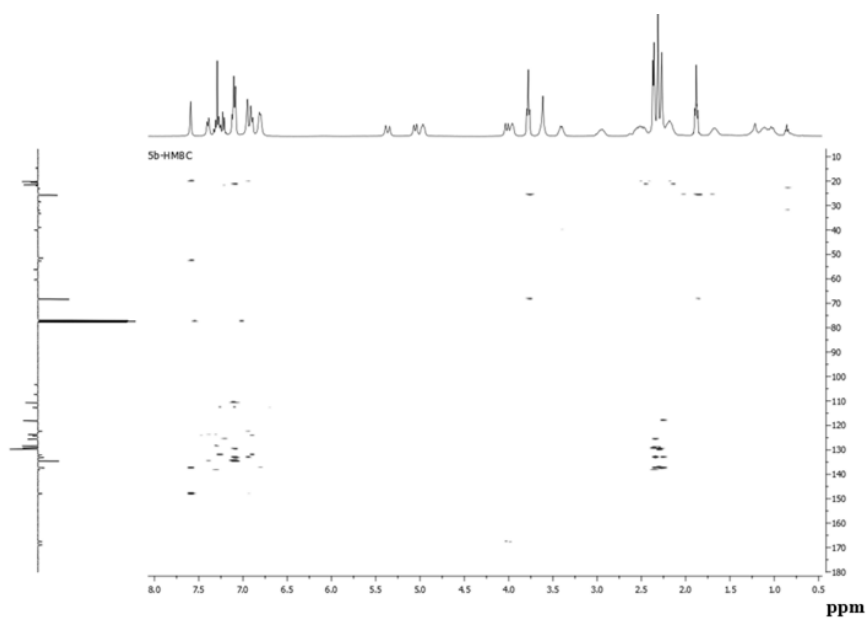

**Figure S52.**  $^{13}\text{C}$ - $^1\text{H}$  HMBC spectrum of **5b** in  $\text{CDCl}_3$  at 213 K.

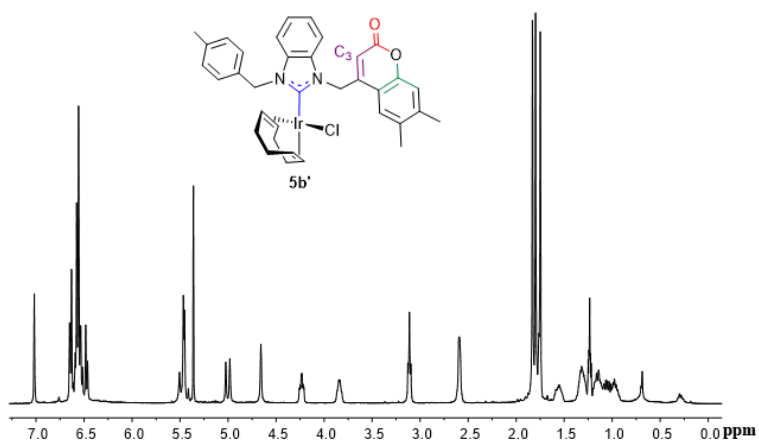

**Figure S53.**  $^1\text{H}$  NMR spectrum of **5b'** in  $\text{C}_2\text{D}_2\text{Cl}_4$  at 363 K.

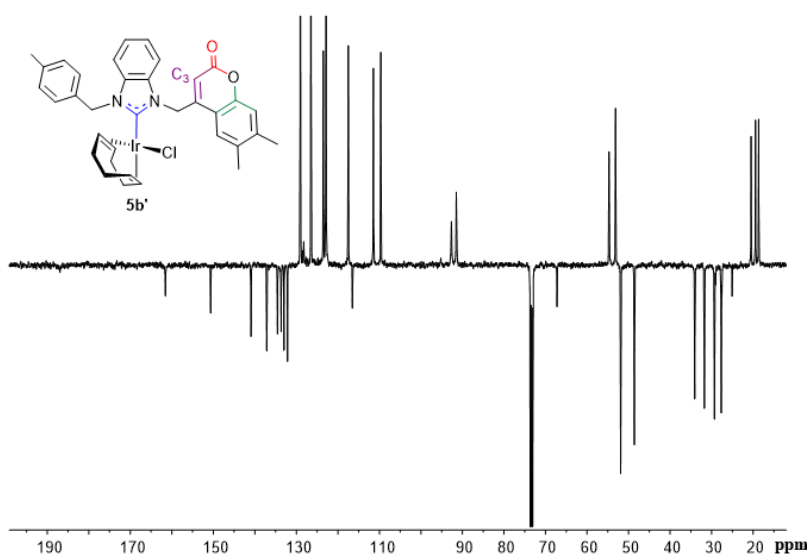

**Figure S54.**  $^{13}\text{C}\{^1\text{H}\}$ -APT NMR spectrum of **5b'** in  $\text{C}_2\text{D}_2\text{Cl}_4$  at 363 K.



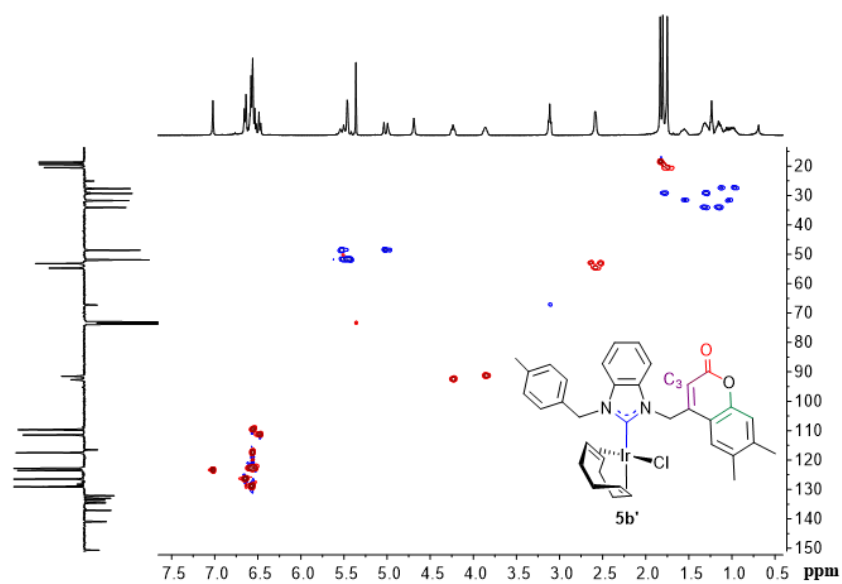

Figure S55.  $^{13}\text{C}$ - $^1\text{H}$  HSQC spectrum of **5b'** in  $\text{C}_2\text{D}_2\text{Cl}_4$  at 363 K.

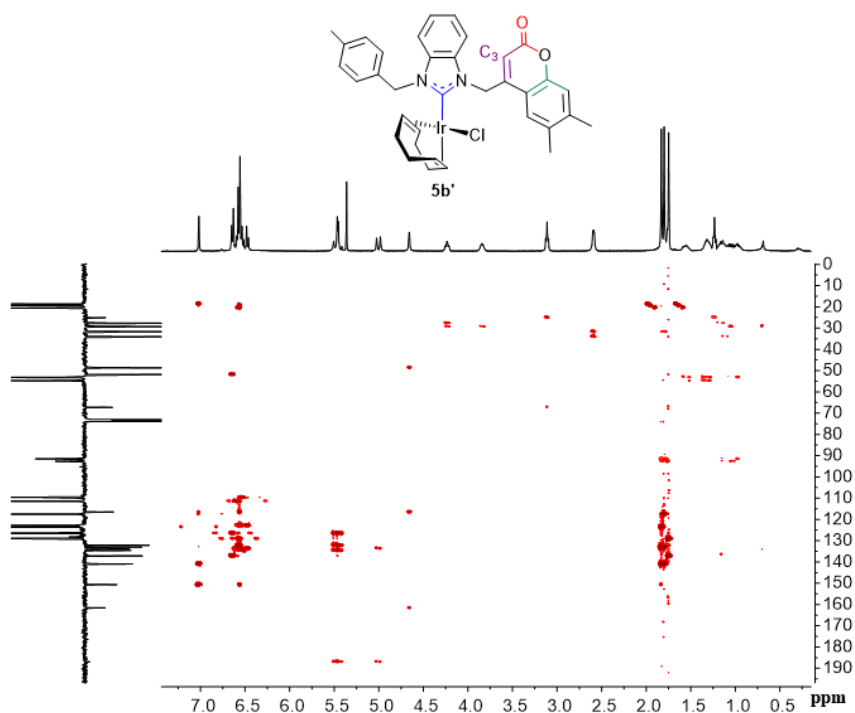

Figure S56.  $^{13}\text{C}$ - $^1\text{H}$  HMBC spectrum of **5b'** in  $\text{C}_2\text{D}_2\text{Cl}_4$  at 363 K.

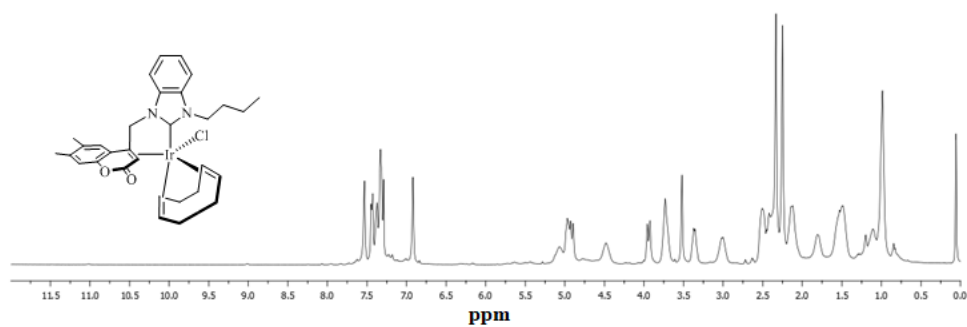

Figure S57.  $^1\text{H}$  NMR spectrum of **5c** in  $\text{CDCl}_3$  at 213 K.

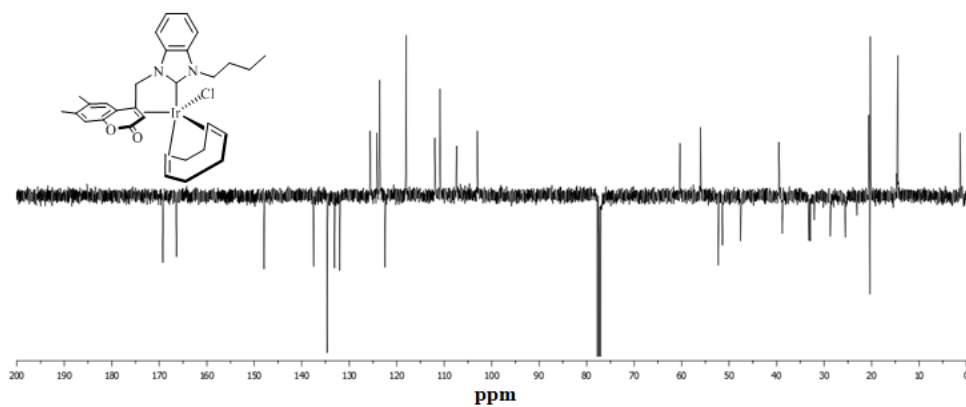

**Figure S58.**  $^{13}\text{C}\{^1\text{H}\}$ -APT NMR spectrum of **5c** in  $\text{CDCl}_3$  at 213 K.

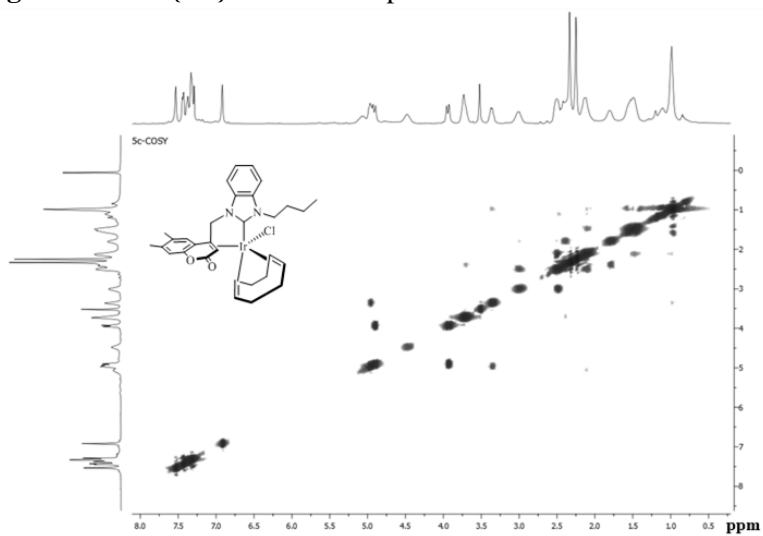

**Figure S59.**  $^1\text{H}$ - $^1\text{H}$  COSY NMR spectrum of **5c** in  $\text{CDCl}_3$  at 213 K.

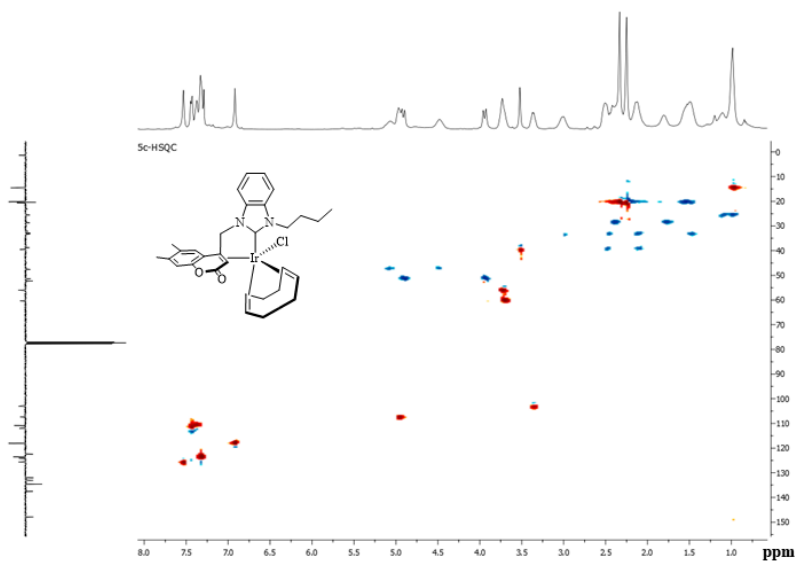

**Figure S60.**  $^{13}\text{C}$ - $^1\text{H}$  HSQC NMR spectrum of **5c** in  $\text{CDCl}_3$  at 213 K.

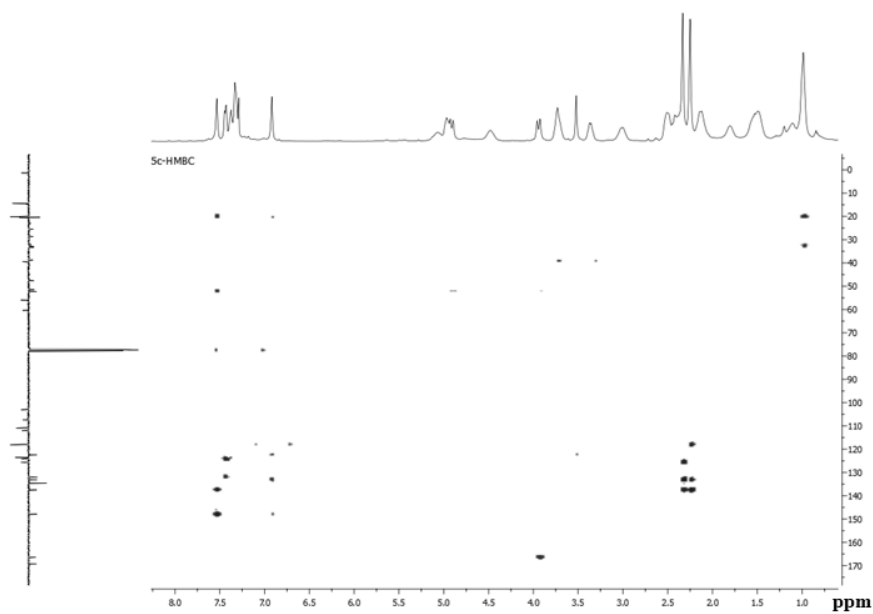

**Figure S61.**  $^{13}\text{C}$ - $^1\text{H}$  HMBC spectrum of **5c** in  $\text{CDCl}_3$  at 213 K.

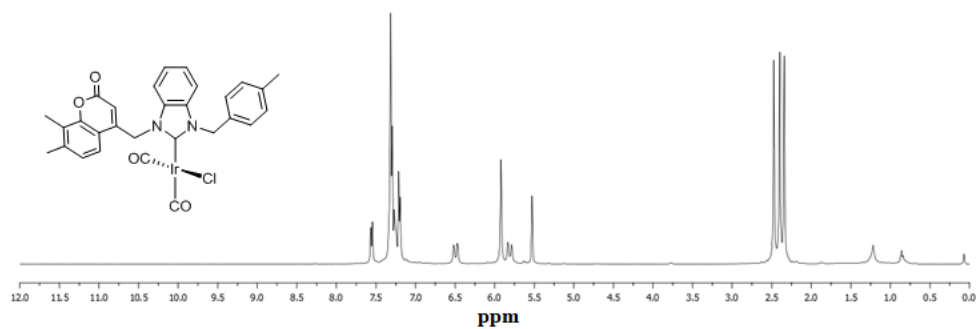

**Figure S62.**  $^1\text{H}$  NMR spectrum of **6** in  $\text{CDCl}_3$  at 213 K.

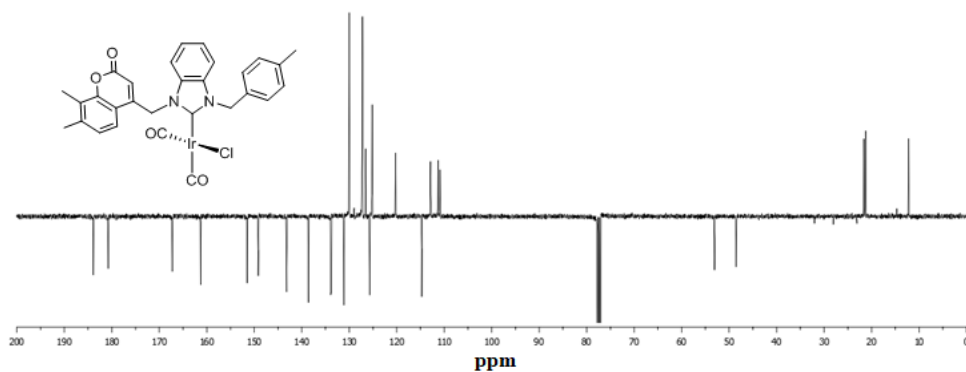

**Figure S63.**  $^{13}\text{C}\{^1\text{H}\}$ -APT NMR spectrum of **6** in  $\text{CDCl}_3$  at 213 K.

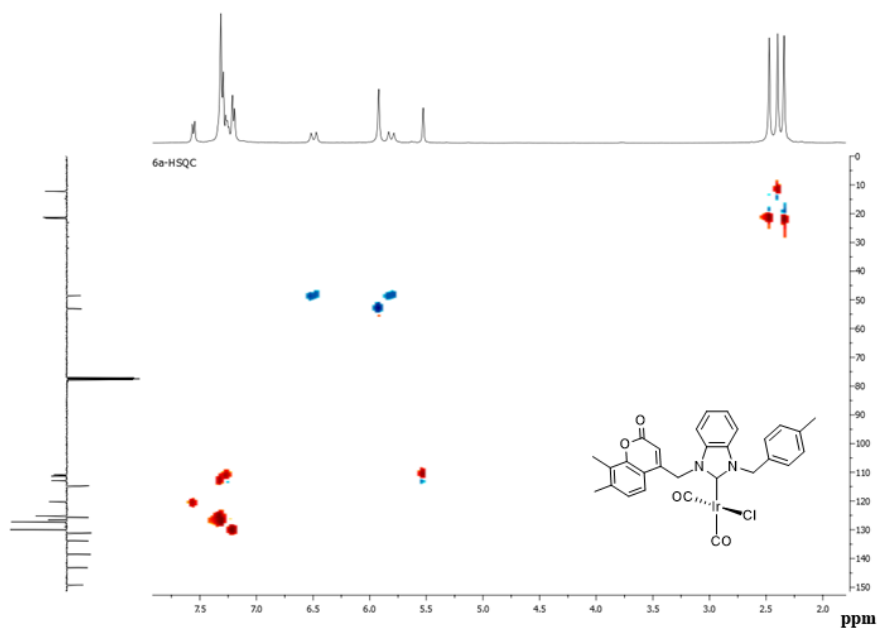

**Figure S64.**  $^{13}\text{C}$ - $^1\text{H}$  HSQC spectrum of **6** in  $\text{CDCl}_3$  at 213 K.

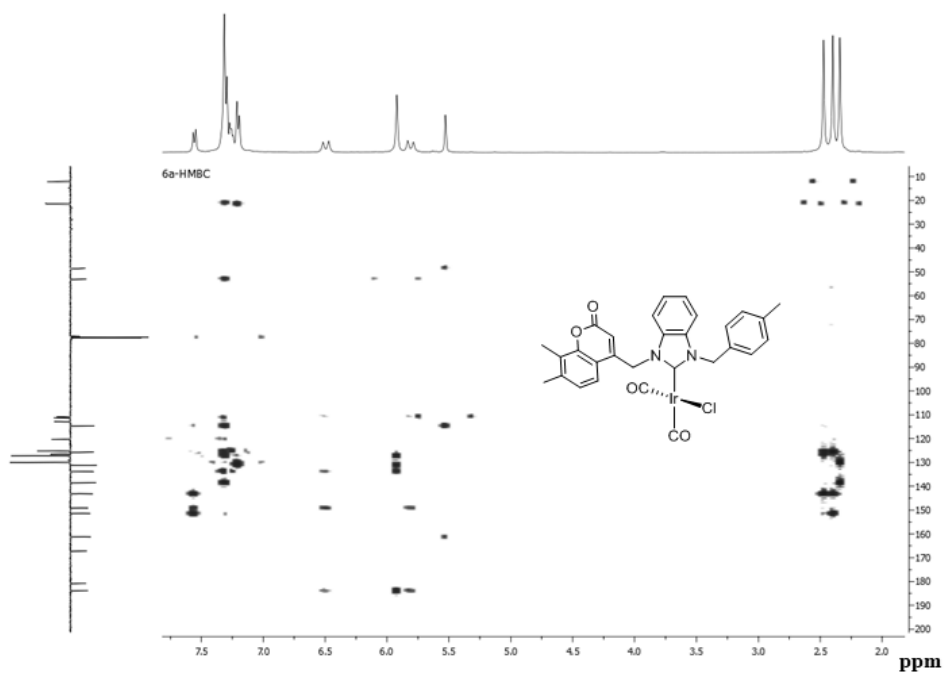

**Figure S65.**  $^{13}\text{C}$ - $^1\text{H}$  HMBC spectrum of **6** in  $\text{CDCl}_3$  at 213 K.

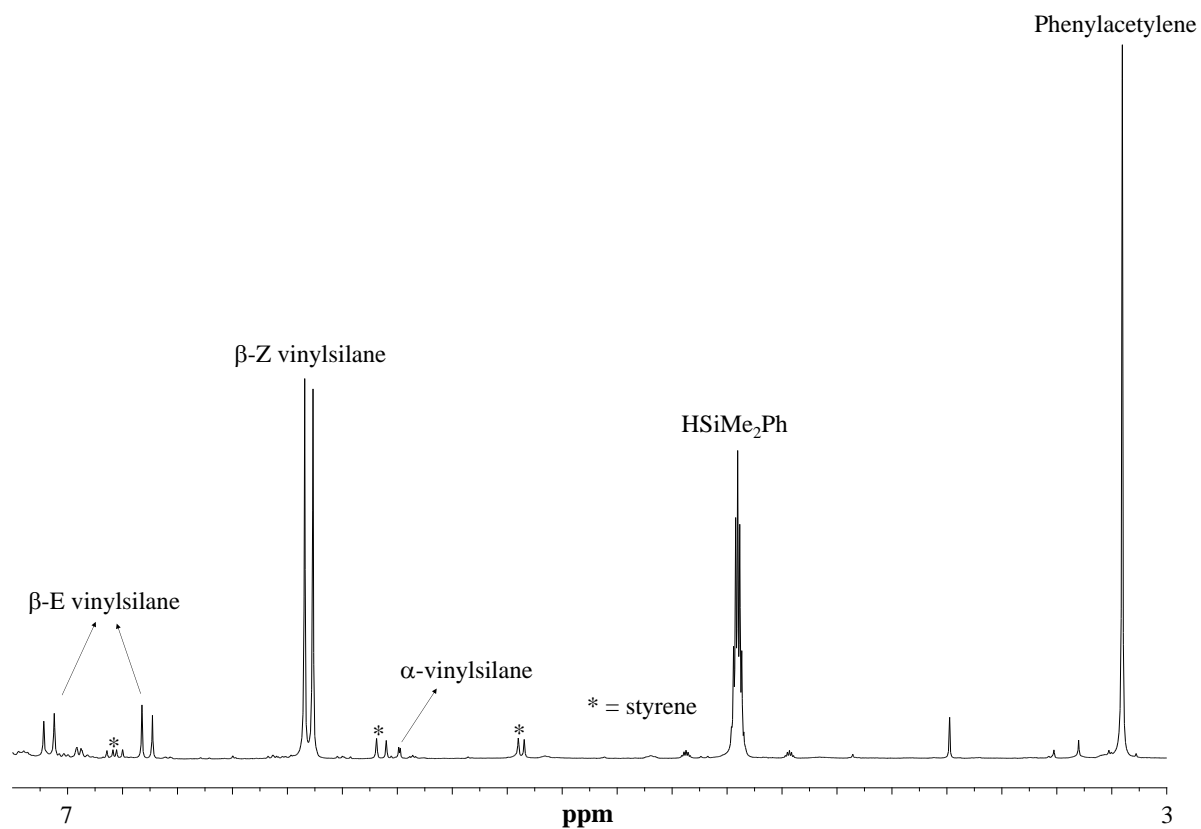

**Figure S66.** Representative  $^1\text{H}$  NMR spectrum ( $\text{CDCl}_3$ ) for the identification of hydrosilylation reaction products: hydrosilylation of phenylacetylene with  $\text{HSiMe}_2\text{Ph}$  catalyzed by **6** after 24 h (entry 9, Table 1).

## References

- 1 M. S. Frasinuk, S. P. Bondarenko, V. P. Khilya, *Chem. Nat. Compd.*, 2006, **42**, 142-14.
- 2 M. O. Karataş, A. Di Giuseppe, V. Passarelli, B. Alıcı, J. J. Perez-Torrente, L. A. Oro, I. Özdemir, R. Castarlenas, *Organometallics*, 2018, **37**, 191-202.
